# Supplementary material for: MHC in newts illuminates the evolutionary dynamics of complex regions in giant genomes
Source: HighWire-hosted journal article supplement (doi:10.1101/gr.281127.125), 2026-01-12
Supplement: Supplemental_Materials.pdf [file Supplemental_Materials.pdf]

1 Supplementary Materials

2 MHC in newts illuminates the evolutionary dynamics of complex  
3 regions in giant genomes

4

5 W. Babik, K. Dudek, G. Palomar, M. Marszałek, G. Dubin, M. H. Yun, M. Migalska

6

## 7 Supplementary methods

8 **Samples and RNAs.** Adult *Pterodeles waltl* from a laboratory colony in TU Dresden were mated,  
9 eggs and larvae developed at 19 °C and 12:12 L:D light regime. The following stages were  
10 sampled and preserved in RNAlater: young larvae (stages 38-44 Shi and Boucaut 1995), older  
11 larvae (stages 45-47), metamorphosing larvae (stages 48-49) and metamorphs (stage 50). Because  
12 *P. waltl* larvae are larger than those of other species, starting from stage 46, we sampled separately  
13 also intestine (middle part) and spleen. For all other species we sampled, during the breeding  
14 season, two presumably inseminated females from natural populations (Table S3). The females  
15 were kept in the laboratory until they deposited eggs, were then euthanized with MS222 and  
16 heart, intestine (middle part), liver, lungs, spleen and tail tissue were preserved in RNAlater and  
17 separate libraries were prepared for each tissue. Eggs and larvae developed in the laboratory at  
18 room temperature under the natural light regime. Larvae were fed ad libitum with *Artemia nauplii*  
19 and then with live chironomid larvae. Larvae were euthanized in MS222 and preserved in  
20 RNAlater; depending on their size, they were cut into two (anterior/posterior) or three  
21 (head/middle/tail) parts, preserved and further processed separately (Table S4).

22 **RNA extraction and Illumina RNA-seq.** Total RNA was extracted from tissues preserved in  
23 RNAlater using RNAzol® RT (Sigma) or, if only a very small amount of tissues was available,  
24 RNeasy kits (Qiagen). RNA-seq libraries were constructed using Novogene Plant and Animal  
25 Eukaryotic Strand Specific mRNA (WOBI) approach and sequenced (2 x 150 bp) on the Illumina  
26 NovaSeq platform by Novogene.

27 **Full-length transcripts.** PacBio HiFi reads were clustered into transcripts using SMRT Tools v.  
28 13.1: lima, isoseq refine and isoseq cluster. Only high-quality (hq) Iso-Seq transcripts generated  
29 by this pipeline were used in subsequent analyses. A transcript is labelled hq if: 1) it is supported  
30 by full-length non-chimeric (FLNC) reads with both primers and poly(A) tail detected, 2) the  
31 consensus sequence has been polished using the underlying FLNC reads until the predicted per-  
32 base accuracy  $\geq 99\%$  (QV  $\geq 30$ ), and 3) it passes internal software filters against artifacts such as  
33 chimeras or concatemers.

34 **Identification of MHC transcripts.** First, sequences of the axolotl MHC-I (GenBank  
35 AAC60108) and MHC-II (XP\_069491359.1, AAG42326, XP\_069491364.1, XP\_069491365.1)  
36 proteins were used as queries to identify MHC-I and MHC-II sequences in *P. waltl* reference  
37 transcriptome (Matsunami et al. 2019) using TBLASTN v. 2.15 (Camacho et al. 2009). Both  
38 axolotl and *P. waltl* MHC protein sequences were used to TBLASTN search the Iso-Seq  
39 transcripts from all seven newt species at the E-value threshold of  $1e-30$ . TransDecoder v 5.7.1

40 (Haas et al. 2013) was used to identify Open Reading Frames (ORF) in Iso-Seq transcripts (both  
41 complete and partial ORFs were allowed, single best ORF per transcript). Because a large  
42 number of transcripts were identified (ca. 700 in the case of MHC-I) and visual inspection of  
43 their protein alignments indicated that sequences were often highly similar but differed by the  
44 presence/absence of entire exons, to reduce redundancy we clustered the proteins within each  
45 species based on sequence identity. Clustering was performed using Clusterize() from the R  
46 package DECIPHER (Wright 2016) at the protein sequence divergence threshold 0.1, ignoring  
47 regions containing gaps (penalizeGapLetterMatches = FALSE). The longest protein was selected  
48 as a representative of each cluster. Cluster representatives of the minimum length of 240 amino  
49 acids (aa) were aligned using DECIPHER::AlignSeqs(). The resulting alignments were visually  
50 inspected and sequences lacking more than half of any of  $\alpha/\beta$  1-3 domains, or showing extreme  
51 divergence in a part of the alignment and high similarity to at least one other sequence in the  
52 alignment were removed. While such sequences may represent genuine isoforms, they may also  
53 be artefacts of a limited-cycle PCR which is a part of Iso-Seq library preparation protocol.

54 Because some Iso-Seq clusters were represented by few HiFi reads and because some divergent  
55 MHC lineages contained representatives of only some species, we suspected that our Iso-Seq  
56 dataset may have missed some MHC sequences, especially those poorly expressed in the  
57 intestine. Therefore we supplemented the Iso-Seq dataset with sequences of transcripts obtained  
58 from de novo assemblies of short RNA-seq reads. Separate assemblies were obtained for each of  
59 five individuals per species, including adults, metamorphs, and, for some species, also advanced  
60 larvae (Table S2, S4), reads from all individual's RNA-seq libraries were pooled and assembled  
61 with Trinity v. 2.15 (Grabherr et al. 2011) using --SS\_lib\_type RF parameter suitable for our  
62 stranded RNA-seq libraries, with other settings set to default values. Trinity assemblies were  
63 searched for MHC sequences using TBLASTN with the axolotl and *P. waltl* MHC-I and MHC-II  
64 proteins as queries; sequences with hits of min. 90 aa alignment length and E-value < 1e-40 were  
65 retained. TransDecoder was used to identify the single best ORF per Trinity transcript and the  
66 resulting proteins were clustered together with representative sequences of Iso-Seq clusters.

67 Although the majority of Trinity proteins fell into previously identified clusters, some new  
68 clusters which did not include Iso-Seq sequences and had only Trinity sequences of at least 240  
69 aa appeared. Representative (longest) sequences from such clusters were visually examined for  
70 the signatures of chimaerism, and those that passed this check were added to the dataset. It is  
71 important to note here that Trinity sequences, resulting from de novo assembly of short reads,  
72 may not represent true MHC sequences because of the difficulties of reconstructing full-length  
73 transcripts of similar genes from multigene families from short reads. We decided to include such

74 sequences because they represent, albeit imperfectly, extra MHC diversity present in individuals  
75 or tissues for which Iso-Seq was not available or lowly expressed.

76 **The genomic organisation of the MHC region.** For automatic annotation we used the  
77 available gene predictions for *P. malit* (Brown et al. 2025) and performed de novo prediction with  
78 BRAKER3 (Gabriel et al. 2024) for the remaining three genomes. Because de novo gene  
79 prediction is a complex and computationally intensive task, especially in large genomes, such as  
80 those of newts, we limited our prediction to the MHC region(s) (both core and disparate). We  
81 added other continuous genomic regions, totalling 950 Mb in *L. helveticus* and *L. vulgaris* and 700  
82 Mb in *T. cristatus*, to reach a sufficient number of well-supported genes required to train  
83 prediction algorithms in BRAKER3. The available version of *T. cristatus* genome assembly is  
84 already softmasked for repeats, while in the case of *L. helveticus* and *L. vulgaris* assemblies, we  
85 performed repeat identification and softmasking using RepeatModeler v. 2.0.6 (Flynn et al. 2020)  
86 and RepeatMasker v. 4.1.7 (repeatmasker.org). Both RNA-seq data from target species and  
87 vertebrate proteins from the OrthoDB database (Tegenfeldt et al. 2025) were used for gene  
88 prediction. Predicted protein sequences were extracted from the genome assemblies using gffread  
89 v 0.12.8. (Pertea and Pertea 2020) and annotated using eggNOG-mapper v2 (Cantalapiedra et al.  
90 2021).

91 Because the initial mapping of cluster representatives to genomes indicated that automatic  
92 predictions of MHC genes were in many cases not accurate, MHC-I and MHC-II genes were  
93 annotated manually (also when present outside of the core MHC region). We used the following  
94 sources of information: i) gene models from automatic prediction, ii) mapping of all RNA-seq  
95 libraries from a target species to the genome with hisat2 v. 2.2.1 (Kim et al. 2019), iii) mapping of  
96 all cluster representatives (obtained as described above) from the genus to the genome with  
97 minimap2 v 2.28 (Li 2018), iv) mapping of all Iso-Seq transcripts from the species to the genome  
98 with minimap2. Tracks representing all the data were visualised in IGV v. 2.18.4 (Robinson et al.  
99 2011), coordinates of coding sequences were identified and exported as .bed files. The retrieved  
100 sequences were checked for internal stop codons, and those that did not contain them were  
101 considered as putative MHC genes, forming the dataset G.

102 To identify putative MHC pseudogenes or gene fragments, we extracted for each species exons >  
103 100 bp from all annotated MHC genes, and used BLASTN to search the genome at the E-value  
104 threshold of 1e-10 with scoring adjusted to divergent sequences (-reward 1 -penalty -1 -gapopen  
105 3 -gapextend 2). Hits with at least 70% sequence identity covering at least 80% of the query  
106 sequence located outside manually annotated MHC genes were considered to represent

107 pseudogenes or gene fragments. Complete annotations of the MHC genes and other genes in the  
108 MHC region are provided as .gff files in Supplemental Data.

109 **MHC-I polymorphism.** We did not analyze polymorphism of MHC-I-like genes as the primers  
110 used in previous studies did not amplify them. The alleles from Palomar et al. (2021) and  
111 Gaczorek et al. (2023) were BLASTN-mapped to the respective genomes at the E-value  
112 threshold of  $1e-30$ . Because the majority of alleles produced multiple hits, we considered as valid  
113 all hits within 0.9 of the bitscore of the best hit. Each hit was given the weight  $1/n$ , where  $n$  was  
114 the number of hits, allowing an allele matching multiple locations in the genome to be counted as  
115 a fraction in each, avoiding overestimation of polymorphism for similar genes. The primers used  
116 in Palomar et al. (2021) and Gaczorek et al. (2023) were developed from transcriptome data  
117 before genome assemblies became available, and thus were not guaranteed to amplify all genes.  
118 We therefore screened the primers against all gene sequences to identify potential mismatches in  
119 binding sites. For *L. vulgaris* and *T. cristatus*, we designed additional primers (Table S9), combined  
120 them with those previously published, and re-genotyped MHC-I in 24 individuals per species.  
121 PCR, library preparation, sequencing, and genotyping followed Palomar et al. (2021) and  
122 Gaczorek et al. (2023). In *L. vulgaris*, genotypes from the original and updated primer sets were  
123 nearly identical (2/125 alleles, 1.5%, were new). In *T. cristatus*, 17/126 alleles (13.5%) were new,  
124 yet estimates of polymorphism from the two primer sets were extremely highly correlated ( $R^2 =$   
125 99.8%; Fig. S9). For *P. waltl* we verified, using newly designed primers (Table S9), that *Pleva-06*  
126 and *Pleva-08* genes that previously did not amplify are not polymorphic. We conclude thus that  
127 our assessment of polymorphism of the MHC-I genes annotated in new genomes is accurate.

128 **Phylogenies of MHC proteins.** The G+T dataset protein sequences, together with the axolotl  
129 or *Andrias* as outgroups, were aligned with DECIPHER::AlignSeq(), separately for MHC-I,  
130 MHC-IIA, MHC-IIB, MHC-DMA, MHC-DMB, as well as for MHC-I  $\alpha 1$ ,  $\alpha 2$ , and  $\alpha 3$  domains.  
131 The amino-acid evolution models were identified by ModelTest-NG v. 0.1.7 (Darriba et al. 2020);  
132 because for all alignments JTT + G4 or similar models were selected, we decided to use JTT +  
133 G4 model for all phylogenetic analyses. Maximum likelihood (ML) phylogenies were  
134 reconstructed in RAxML-NG 1.2.2 (Kozlov et al. 2019), and robustness of the obtained  
135 topologies was tested with 100 bootstrap replicates.

136 **MHC-I and MHC-II expression through ontogeny and across tissues.** Expression was  
137 estimated by mapping RNA-seq libraries to two types of references: (i) for the four species with  
138 the available genome assemblies, RNA-seq reads were mapped to genomes with hisat2 and reads  
139 mapped to the annotated MHC genes, pseudogenes and gene fragments were counted with

140 featureCounts v. 2.0.8 (Liao et al. 2014) – this analysis provided detailed expression information  
141 for MHC sequences present in reference genomes, (ii) for all seven species, RNA-seq reads were  
142 mapped to the cluster representatives using Bowtie2 v. 2.5.1 (Langmead and Salzberg 2012) and  
143 the number of reads mapped to each reference was calculated with samtools idxstats – this  
144 analysis provided expression estimates for all full length MHC coding sequences identified in our  
145 samples. Expression was estimated separately for each library as Fragments Per Kilobase of  
146 transcript length per Million reads mapped (FPKM); in the analysis of all seven species we  
147 assumed mapping rate of 0.895 as this was the average for the four species with the available  
148 genome assemblies.

149 **Gene tree – species tree reconciliation.** The analysis was performed using Notung v. 3.0\_25  
150 beta (Durand et al. 2006) on two datasets that used different gene trees: (i) G, and (ii) G+T.  
151 Notung analyses used ML trees constructed using protein sequences with RAxML-NG (see  
152 above). Notung bootstrap edge weight threshold parameter, which indicates which branches are  
153 “weak”, i.e., weakly supported, was set to 50, the cost of duplication and cost of loss were kept at  
154 the default values of 1.5 and 1.0. After reconciliation tree was adjusted to further optimise the  
155 number of duplications and losses by rearranging “weak” edges, that can be swapped in their  
156 placement without strongly contradicting the data.

157 **Testing for gene conversion.** Gene conversion was tested using coding DNA sequences of the  
158 G+T dataset after removing sequences assembled by Trinity from short RNA-seq reads, as some  
159 of them could have been computationally generated chimaeras that may produce a false  
160 recombination signal. The analyses were performed separately for MHC-I and MHC-I-like  
161 genes, because high sequence divergence between them makes conversion unlikely and because  
162 including numerous sequences would reduce the power of the test by inflating the number of  
163 pairwise comparisons that would necessitate stringent correction for multiple testing. MHC-I-like  
164 sequences from all species were analysed together due to their relatively small number. MHC-I  
165 sequences from each species were analysed separately as we were mostly interested in species-  
166 specific gene conversion events. The analyses were performed using geneconv v. 1.81a (Padidam  
167 et al. 1999) and were run both allowing no mismatches within conversion tracts ( $g = 0$ ) and using  
168 the more permissive setting allowing for some mismatches ( $g = 1$ ) and thus enabling detection of  
169 older conversion events.

170 **Selective pressures acting on MHC-I and MHC-I-like genes.** Tests of selective pressures  
171 were performed applying methods implemented in HyPhy v. 2.5.8 (Kosakovsky Pond et al.  
172 2020), using protein-guided codon alignment of the G+T dataset obtained with DECIPHER::  
173 AlignTranslation() and approximately ML phylogeny inferred with FastTree v. 2.1.11 (Price et al.

174 2010). RELAX (Wertheim et al. 2015) was used to test whether a change in the strength of  
175 selection occurred (i) along the long branches separating MHC-I-like1 and MHC-I-like2 from  
176 other sequences in MHC-I phylogeny, (ii) within MHC-I-like1 and MHC-I-like2 clusters. FUBAR  
177 (Murrell et al. 2013) was used to identify codons under positive/purifying selection, separately for  
178 MHC-I, MHC-I-like1 and MHC-I-like2. FUBAR analysis was limited to  $\alpha 1$ – $\alpha 3$  domains.

179 **Structural modelling.** Genomic sequences of MHC-I-like1 molecules were obtained for *L.*  
180 *vulgaris* and *P. waltl*, while MHC-I-like2 sequences were identified in *L. helveticus*, *L. vulgaris*, and *T.*  
181 *cristatus*. A putative *P. waltl* MHC-I-like2 locus was also identified on a different chromosome  
182 than the core MHC region. This locus contained an ORF spanning 20 exons, several of which  
183 appeared to encode domains atypical of MHC molecules. Given its likely chimeric and non-  
184 functional nature, this gene was excluded from structural modelling. Signal peptides were  
185 predicted using SignalP 6.0 (Teufel et al. 2021) and removed prior to structural modelling. MHC-  
186 I-like2 molecules contained short N-terminal sequences resembling leader peptides; however, not  
187 confidently identified by SignalP. Therefore, these regions were manually trimmed based on  
188 sequence alignment with classical MHC-I molecules. Genomic sequences of all MHC-I-like  
189 molecules and one putative classical molecule per species (*L. helveticus*: *Lihe-01*, *L. vulgaris*: *Livu-03*,  
190 *T. cristatus*: *Trcr-01*, *P. waltl*: *Plwa-01*), together with corresponding  $\beta 2m$ , were modelled with the  
191 Alphafold3 Server (Abramson et al. 2024; default settings, access April 2025). Structures were  
192 visualized with UCSF ChimeraX 1.9 (Meng et al. 2023). A search for structural homology was  
193 performed with DALI server (Holm 2022).

## 194 Supplementary References

- 195 Abramson J, Adler J, Dunger J, Evans R, Green T, Pritzel A, Ronneberger O, Willmore L,  
196 Ballard AJ, Bambrick J. 2024. Accurate structure prediction of biomolecular interactions  
197 with AlphaFold 3. *Nature* **630**: 493–500.
- 198 Almeida T, Ohta Y, Gaigher A, Muñoz-Mérida A, Neves F, Castro LFC, Machado AM, Esteves  
199 PJ, Verissimo A, Flajnik MF. 2021. A highly complex, MHC-linked, 350 million-year-old  
200 shark nonclassical class I lineage. *J Immunol* **207**: 824–836.
- 201 Brown T, Mishra K, Elewa A, Iarovenko S, Subramanian E, Araus AJ, Petzold A, Fromm B,  
202 Friedländer MR, Rikk L. 2025. Chromosome-scale genome assembly reveals how repeat  
203 elements shape non-coding RNA landscapes active during newt limb regeneration. *Cell*  
204 *genomics* **5**. doi: 10.1016/j.xgen.2025.100761.
- 205 Camacho C, Coulouris G, Avagyan V, Ma N, Papadopoulos J, Bealer K, Madden TL. 2009.  
206 BLAST+: architecture and applications. *BMC Bioinformatics* **10**: 1–9.

- 207 Cantalapiedra CP, Hernández-Plaza A, Letunic I, Bork P, Huerta-Cepas J. 2021. eggNOG-  
208 mapper v2: functional annotation, orthology assignments, and domain prediction at the  
209 metagenomic scale. *Mol Biol Evol* **38**: 5825–5829.
- 210 Darriba D, Posada D, Kozlov AM, Stamatakis A, Morel B, Flouri T. 2020. ModelTest-NG: a new  
211 and scalable tool for the selection of DNA and protein evolutionary models. *Mol Biol Evol*  
212 **37**: 291–294.
- 213 Durand D, Halldórsson BV, Vernot B. 2006. A Hybrid Micro–Macroevolutionary Approach to  
214 Gene Tree Reconstruction. *J Comput Biol* **13**: 320–335.
- 215 Flynn JM, Hubley R, Goubert C, Rosen J, Clark AG, Feschotte C, Smit AF. 2020.  
216 RepeatModeler2 for automated genomic discovery of transposable element families. *Proc*  
217 *Natl Acad Sci USA* **117**: 9451–9457.
- 218 Gabriel L, Br\uuuna T, Hoff KJ, Ebel M, Lomsadze A, Borodovsky M, Stanke M. 2024.  
219 BRAKER3: Fully automated genome annotation using RNA-seq and protein evidence  
220 with GeneMark-ETP, AUGUSTUS, and TSEBRA. *Genome Research* **34**: 769–777.
- 221 Grabherr MG, Haas BJ, Yassour M, Levin JZ, Thompson DA, Amit I, Adiconis X, Fan L,  
222 Raychowdhury R, Zeng Q, et al. 2011. Full-length transcriptome assembly from RNA-  
223 Seq data without a reference genome. *Nat Biotech* **29**: 644–652.
- 224 Haas BJ, Papanicolaou A, Yassour M, Grabherr M, Blood PD, Bowden J, Couger MB, Eccles D,  
225 Li BO, Lieber M. 2013. De novo transcript sequence reconstruction from RNA-seq using  
226 the Trinity platform for reference generation and analysis. *Nature protocols* **8**: 1494–1512.
- 227 Holm L. 2022. Dali server: structural unification of protein families. *Nucl Acid Res* **50**: W210–  
228 W215.
- 229 Kaufman J, Salomonsen J, Flajnik M. 1994. Evolutionary conservation of MHC class I and class  
230 II molecules - different yet the same. *Sem Immun* **6**: 411–424.
- 231 Kim D, Paggi JM, Park C, Bennett C, Salzberg SL. 2019. Graph-based genome alignment and  
232 genotyping with HISAT2 and HISAT-genotype. *Nat Biotech* **37**: 907–915.
- 233 Kosakovsky Pond SL, Poon AF, Velazquez R, Weaver S, Hepler NL, Murrell B, Shank SD,  
234 Magalis BR, Bouvier D, Nekrutenko A. 2020. HyPhy 2.5—a customizable platform for  
235 evolutionary hypothesis testing using phylogenies. *Mol Biol Evol* **37**: 295–299.
- 236 Kozlov AM, Darriba D, Flouri T, Morel B, Stamatakis A. 2019. RAxML-NG: a fast, scalable and  
237 user-friendly tool for maximum likelihood phylogenetic inference. *Bioinformatics* **35**: 4453–  
238 4455.
- 239 Langmead B, Salzberg SL. 2012. Fast gapped-read alignment with Bowtie 2. *Nat Meth* **9**: 357–359.
- 240 Li H. 2018. Minimap2: pairwise alignment for nucleotide sequences. *Bioinformatics* **34**: 3094–3100.
- 241 Liao Y, Smyth GK, Shi W. 2014. featureCounts: an efficient general purpose program for  
242 assigning sequence reads to genomic features. *Bioinformatics* **30**: 923–930.
- 243 Matsunami M, Suzuki M, Haramoto Y, Fukui A, Inoue T, Yamaguchi K, Uchiyama I, Mori K,  
244 Tashiro K, Ito Y. 2019. A comprehensive reference transcriptome resource for the



245 Iberian ribbed newt *Pleurodeles waltl*, an emerging model for developmental and  
246 regeneration biology. *DNA Research* **26**: 217–229.

247 Meng EC, Goddard TD, Pettersen EF, Couch GS, Pearson ZJ, Morris JH, Ferrin TE. 2023.  
248 UCSF CHIMERAX : Tools for structure building and analysis. *Protein Sci* **32**: e4792.

249 Murrell B, Moola S, Mabona A, Weighill T, Sheward D, Kosakovsky Pond SL, Scheffler K. 2013.  
250 FUBAR: a fast, unconstrained bayesian approximation for inferring selection. *Mol Biol*  
251 *Evol* **30**: 1196–1205.

252 Padidam M, Sawyer S, Fauquet CM. 1999. Possible emergence of new geminiviruses by frequent  
253 recombination. *Virology* **265**: 218–225.

254 Perteua G, Perteua M. 2020. GFF utilities: GffRead and GffCompare. *F1000Research* **9**: ISCB-  
255 Comm.

256 Price MN, Dehal PS, Arkin AP. 2010. FastTree 2—approximately maximum-likelihood trees for  
257 large alignments. *PLoS one* **5**: e9490.

258 Robinson JT, Thorvaldsdóttir H, Winckler W, Guttman M, Lander ES, Getz G, Mesirov JP.  
259 2011. Integrative genomics viewer. *Nat Biotech* **29**: 24–26.

260 Sammut B, Du Pasquier L, Ducoroy P, Laurens V, Marcuz A, Tournefier A. 1999. Axolotl MHC  
261 architecture and polymorphism. *Eur J Immunol* **29**: 2897–2907.

262 Shi DL, Boucaut JC. 1995. The chronological development of the urodele amphibian *Pleurodeles*  
263 *waltl* (Michah). *Int J Dev Biol* **39**: 427–441.

264 Tegenfeldt F, Kuznetsov D, Manni M, Berkeley M, Zdobnov EM, Kriventseva EV. 2025.  
265 OrthoDB and BUSCO update: annotation of orthologs with wider sampling of genomes.  
266 *Nucl Acid Res* **53**: D516–D522.

267 Teufel F, Armenteros JJA, Johansen AR, Gíslason MH, Pihl SI, Tsirigos KD, Winther O, Brunak  
268 S, Von Heijne G, Nielsen H. 2021. SignalP 6.0 achieves signal peptide prediction across  
269 all types using protein language models. *BioRxiv* 2021–06.

270 Wertheim JO, Murrell B, Smith MD, Kosakovsky Pond SL, Scheffler K. 2015. RELAX: detecting  
271 relaxed selection in a phylogenetic framework. *Mol Biol Evol* **32**: 820–832.

272 Wright ES. 2016. Using DECIPHER v2. 0 to analyze big biological sequence data in R. *R Journal*  
273 **8**: 352–359.

274

275

276 [Supplementary Tables](#)

277 Are in a separate Excel workbook.



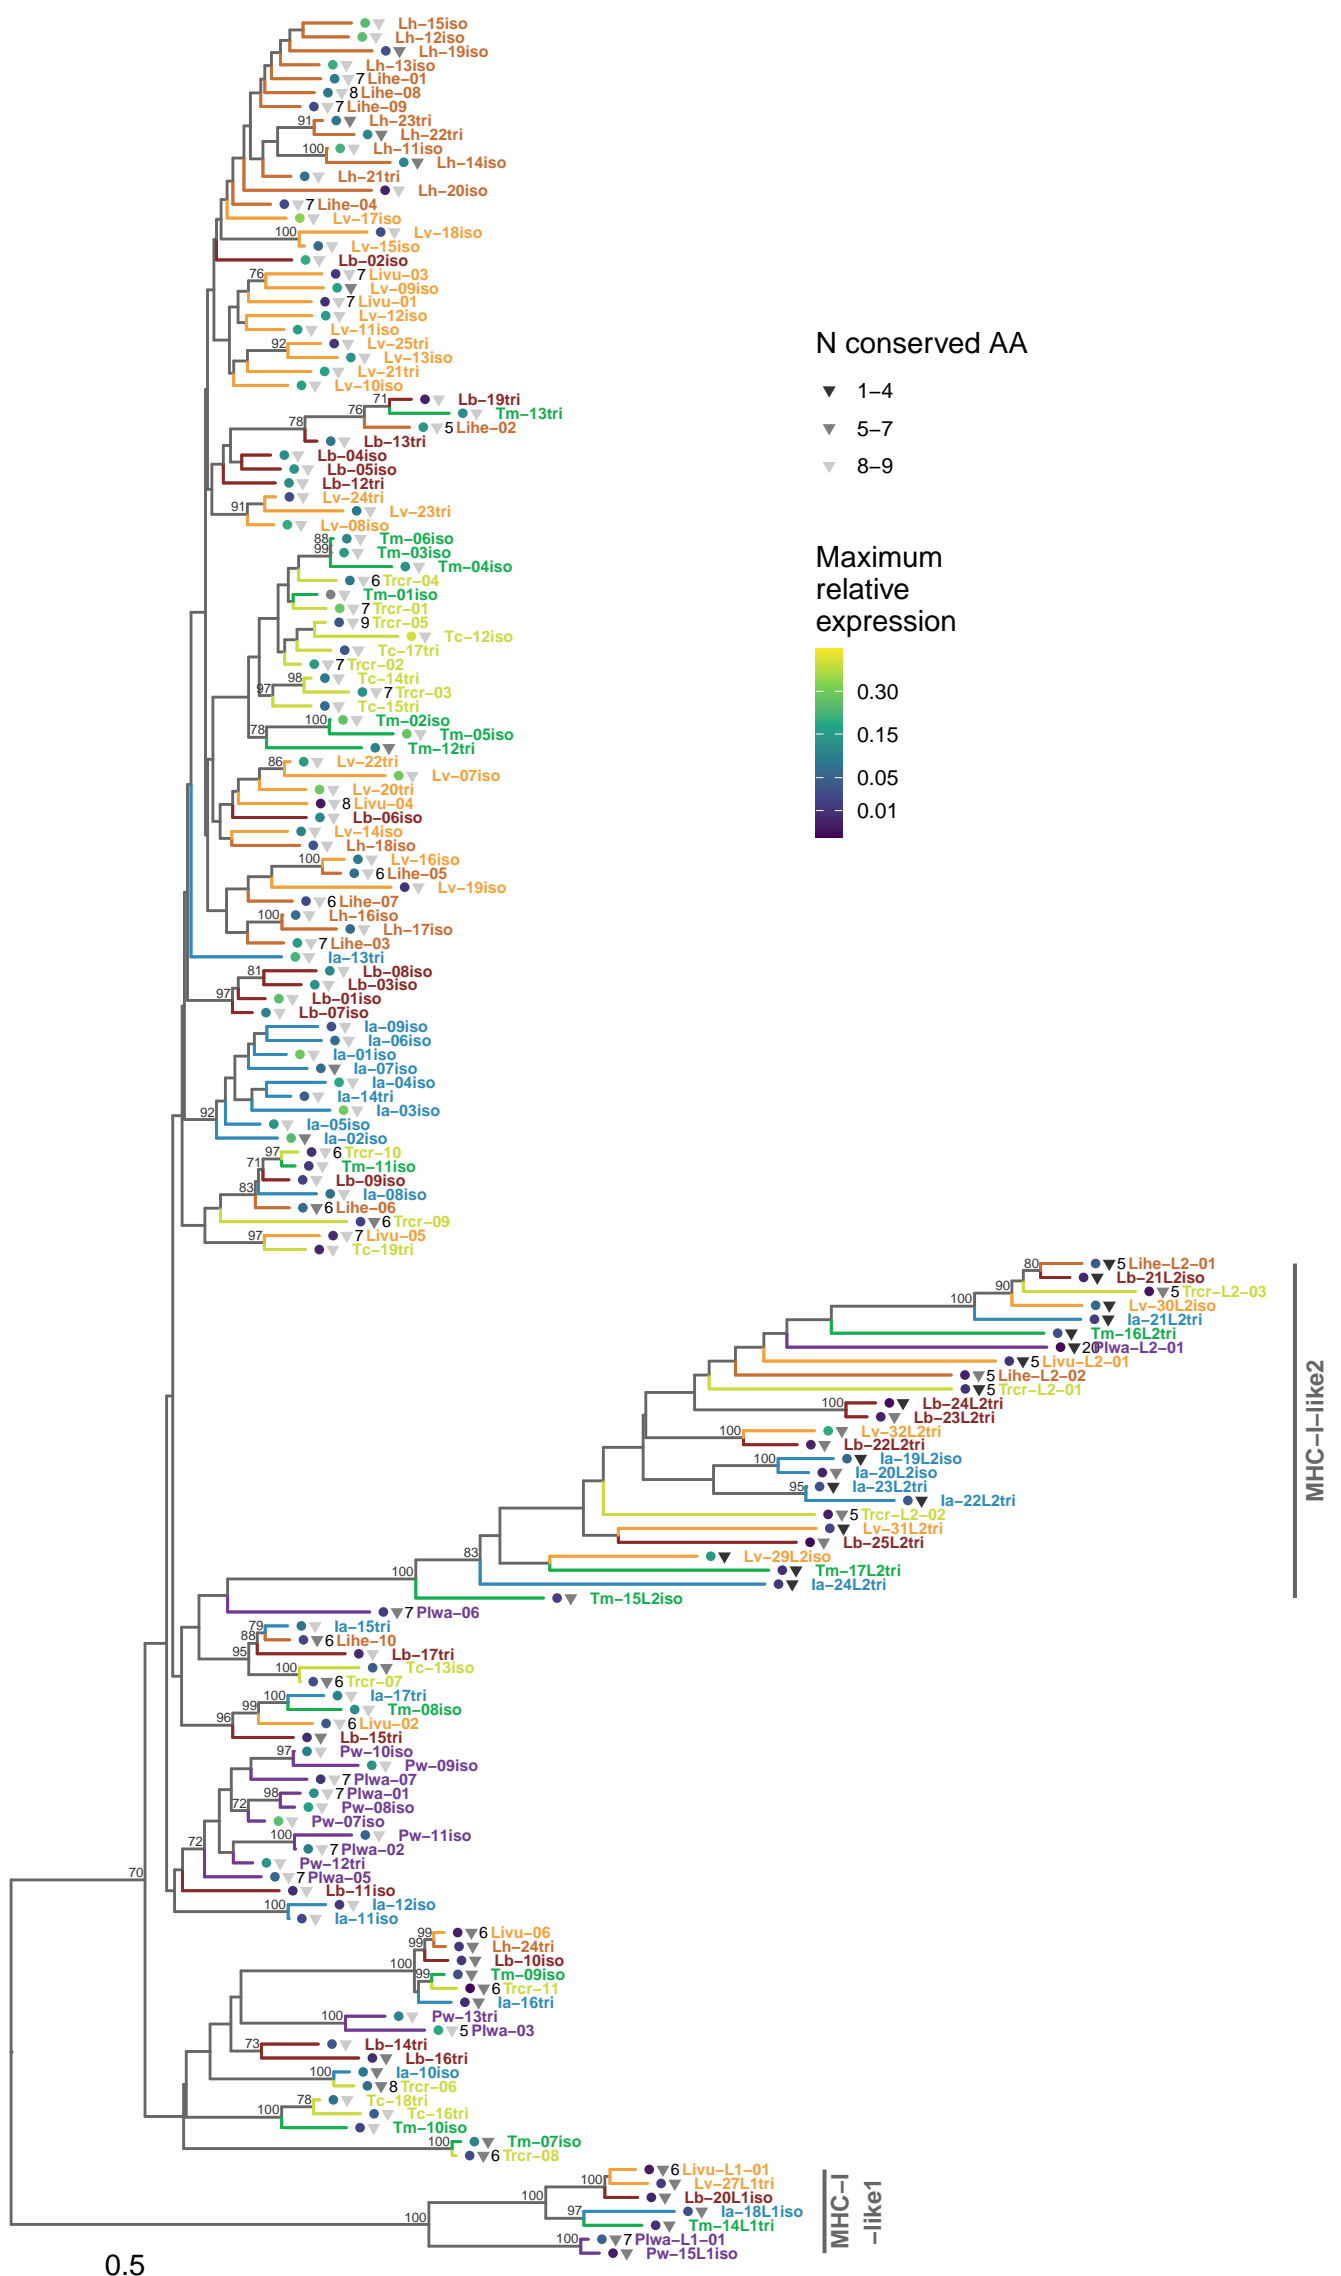

0.5

MHC-I-like2

MHC-I-like1

**Fig. S1. Phylogeny of MHC-I and MHC-I-like sequences.** The RAxML-NG maximum likelihood tree constructed from protein sequences under the JTT+G4 amino-acid substitution model. The tree was rooted with *Andrias* sequence (GenBank AGY55973, not shown). Support values for clades with the minimum bootstrap support of 70% (100 bootstrap replicates) are shown. The tree contains sequences from the G+T dataset (as described in Materials and Methods) obtained from PacBio Iso-Seq, de novo assembly of RNA-seq and protein sequences predicted for manually annotated MHC genes in genome assemblies of *L. helveticus*, *L. vulgaris*, *P. waltl* and *T. cristatus*. For sequences predicted in genomes the number of protein-coding exons is shown. Circles at tippoints show maximum relative expression – the maximum fraction of total MHC-I expression (FPKM) attributable to a sequence across all RNA-seq libraries from postmetamorphic individuals within a species. Triangles show N conserved AA – the number of residues important for anchoring the termini of antigenic peptides containing amino acids that are conserved in classical MHC-I of most taxa. Sequences are color-coded according to the species and species phylogeny is in Fig. 1.

## DMA

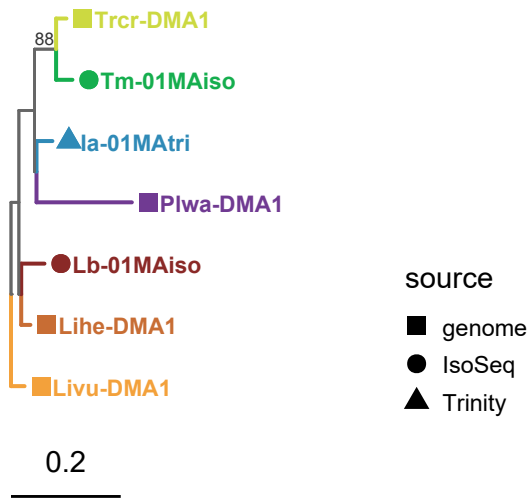

## DMB

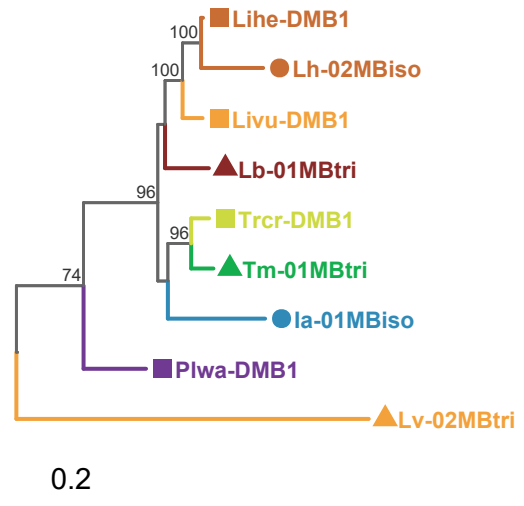

## MHC-IIA

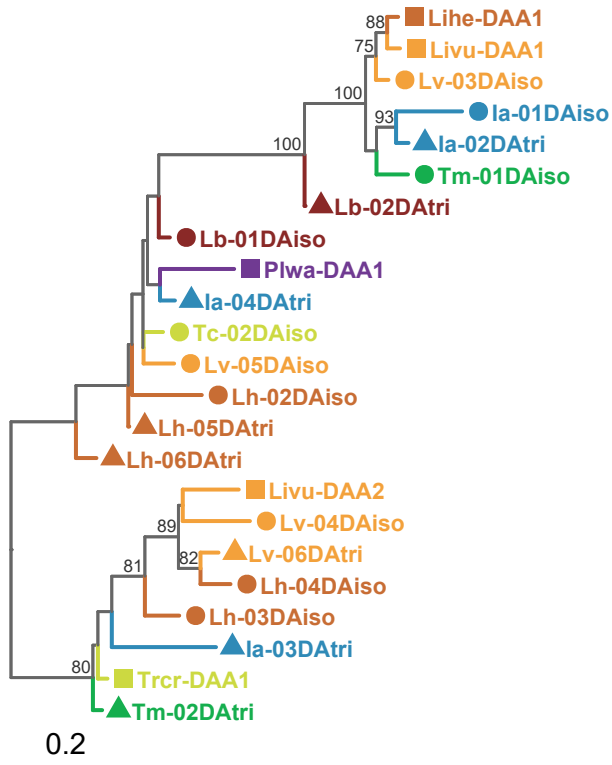

## MHC-IIB

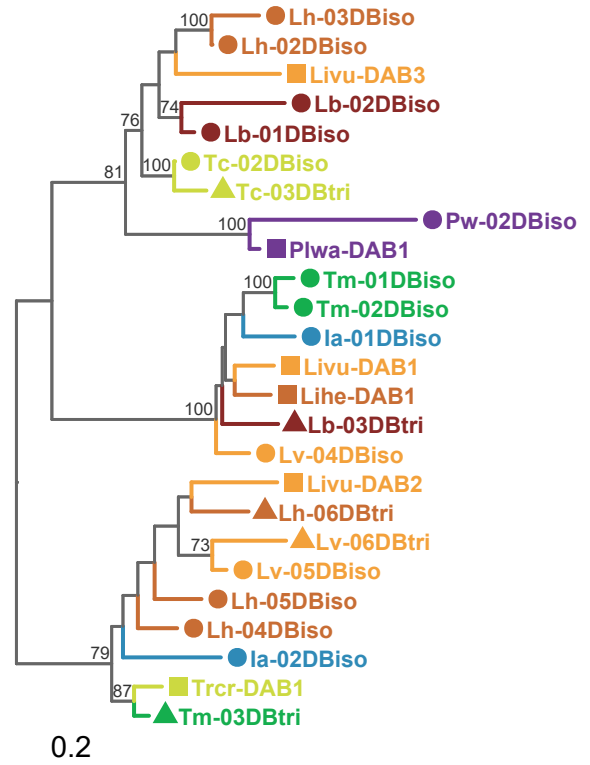

**Fig. S2. Phylogenies of MHC-II sequences.** Separate trees were constructed for  $\alpha$  and  $\beta$  chains of DM and other class II proteins. The RAxML-NG maximum likelihood trees were constructed from protein sequences under the JTT+G4 amino-acid substitution model. The trees were rooted with *Andrias* or axolotl sequences (not shown). Support values for clades with the minimum bootstrap support of 70% (100 bootstrap replicates) are shown. The tree contains sequences from the G+T dataset (as described in Materials and Methods) obtained from PacBio Iso-Seq, de novo assembly of RNA-seq and protein sequences predicted for manually annotated MHC genes in genome assemblies of *L. helveticus*, *L. vulgaris*, *P. waltl* and *T. cristatus*. Sequences are color-coded according to the species and species phylogeny is in Fig. 1.

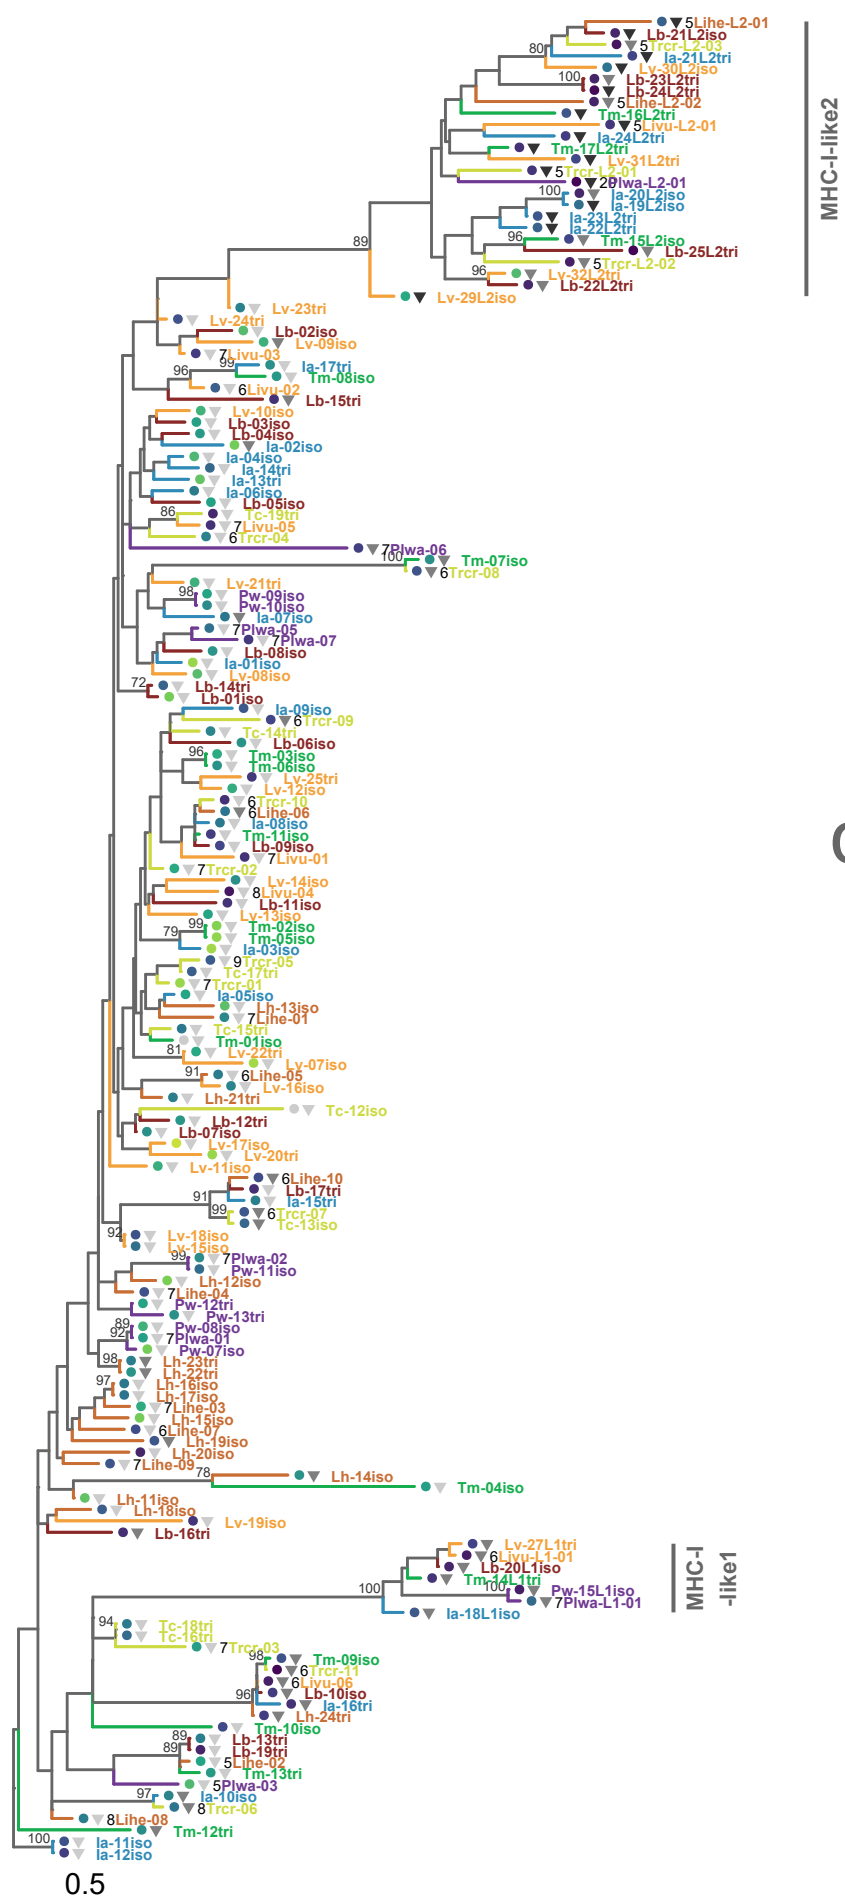

$\alpha 1$

Maximum relative expression

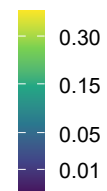

N conserved AA

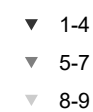

0.5



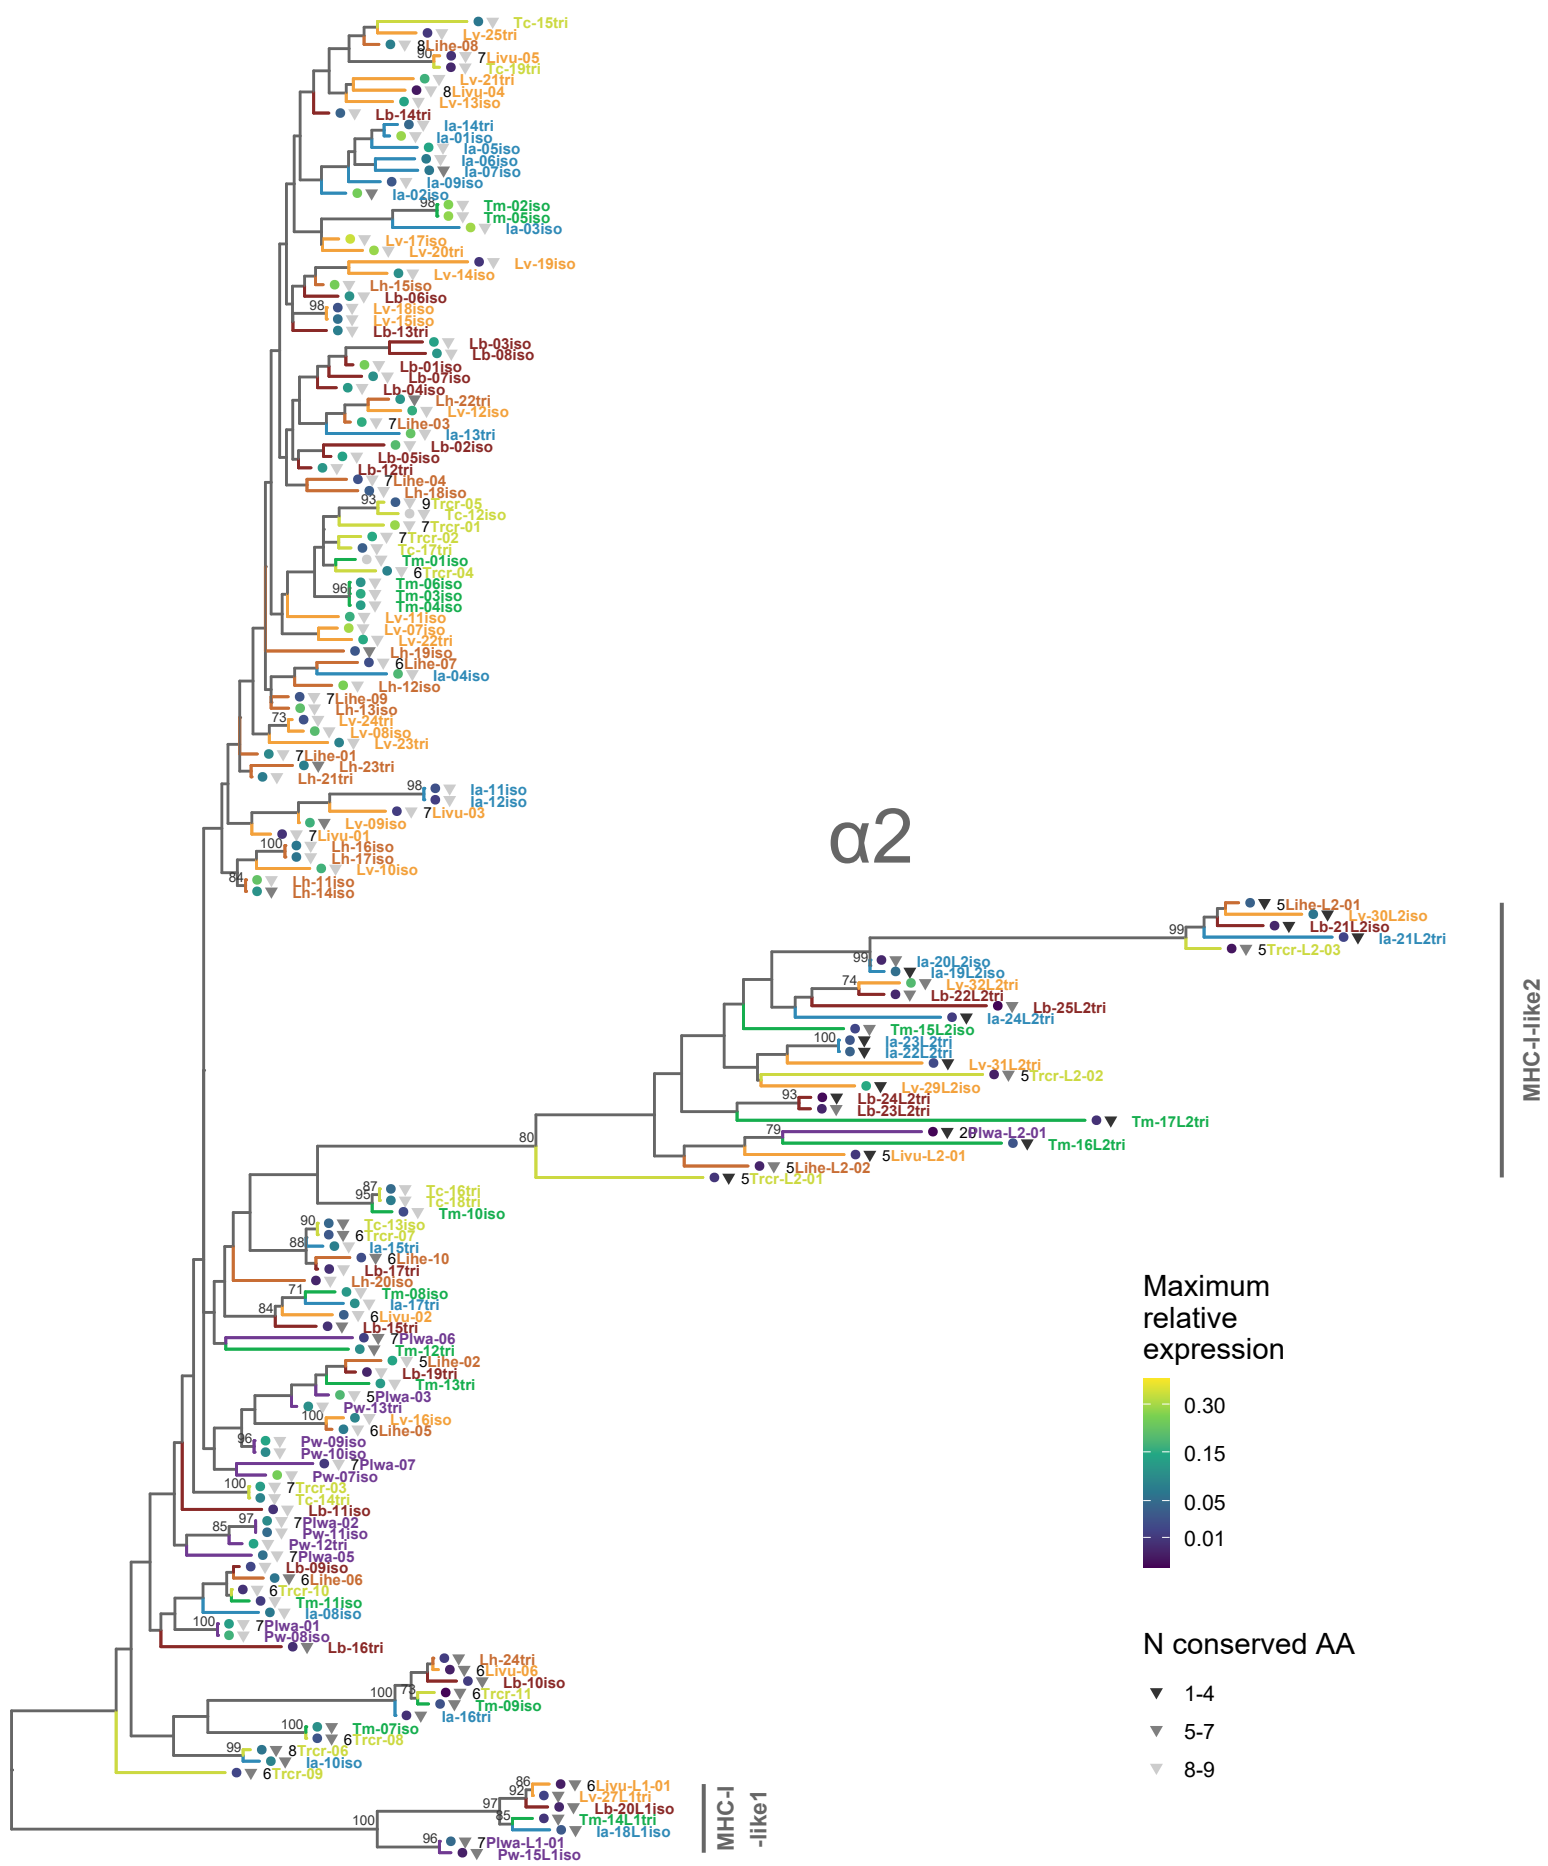

α2

MHC-I-like2

Maximum relative expression

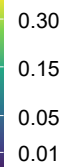

N conserved AA

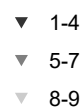

0.5

MHC-I-like1

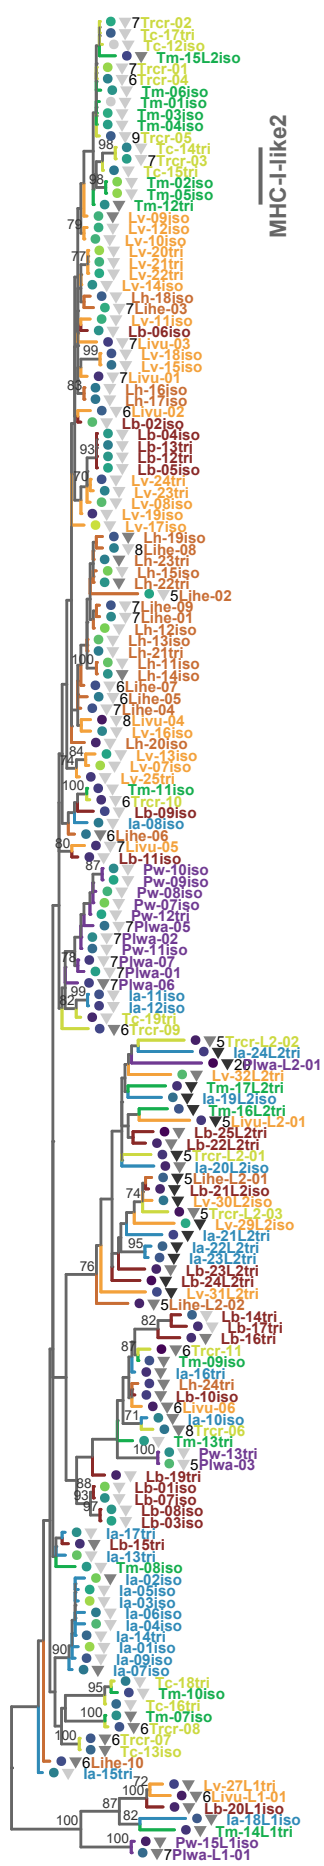

$\alpha 3$

Maximum relative expression

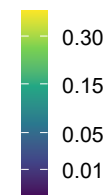

N conserved AA

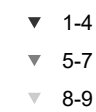

**Fig. S3-S5. Phylogenies of MHC-I and MHC-I-like domains  $\alpha 1$ ,  $\alpha 2$ , and  $\alpha 3$ .** The RAxML-NG maximum likelihood tree constructed from protein sequences under the JTT+G4 amino-acid substitution model. The tree was rooted with *Andrias* sequence (GenBank AGY55973, not shown). Support values for clades with the minimum bootstrap support of 70% (100 bootstrap replicates) are shown. The tree contains sequences from the G+T dataset (as described in Materials and Methods) obtained from PacBio Iso-Seq, de novo assembly of RNA-seq and protein sequences predicted for manually annotated MHC genes in genome assemblies of *L. helveticus*, *L. vulgaris*, *P. maitl* and *T. cristatus*. For sequences predicted in genomes the number of protein-coding exons is shown. Circles at tippoints show maximum relative expression – the maximum fraction of total MHC-I expression (FPKM) attributable to a sequence across all RNA-seq libraries from postmetamorphic individuals within a species. Triangles show N conserved AA – the number of residues important for anchoring the termini of antigenic peptides containing amino acids that are conserved in classical MHC-I of most taxa. Sequences are color-coded according to the species and species phylogeny is in Fig. 1. Note, that in Fig. S5 ( $\alpha 3$ ) tree, a single *T. marmoratus* MHC-I-like2 sequence did not cluster together with the remaining MHC-I-like2 sequences, so the labelled MHC-I-like2 clade does not include this sequence.

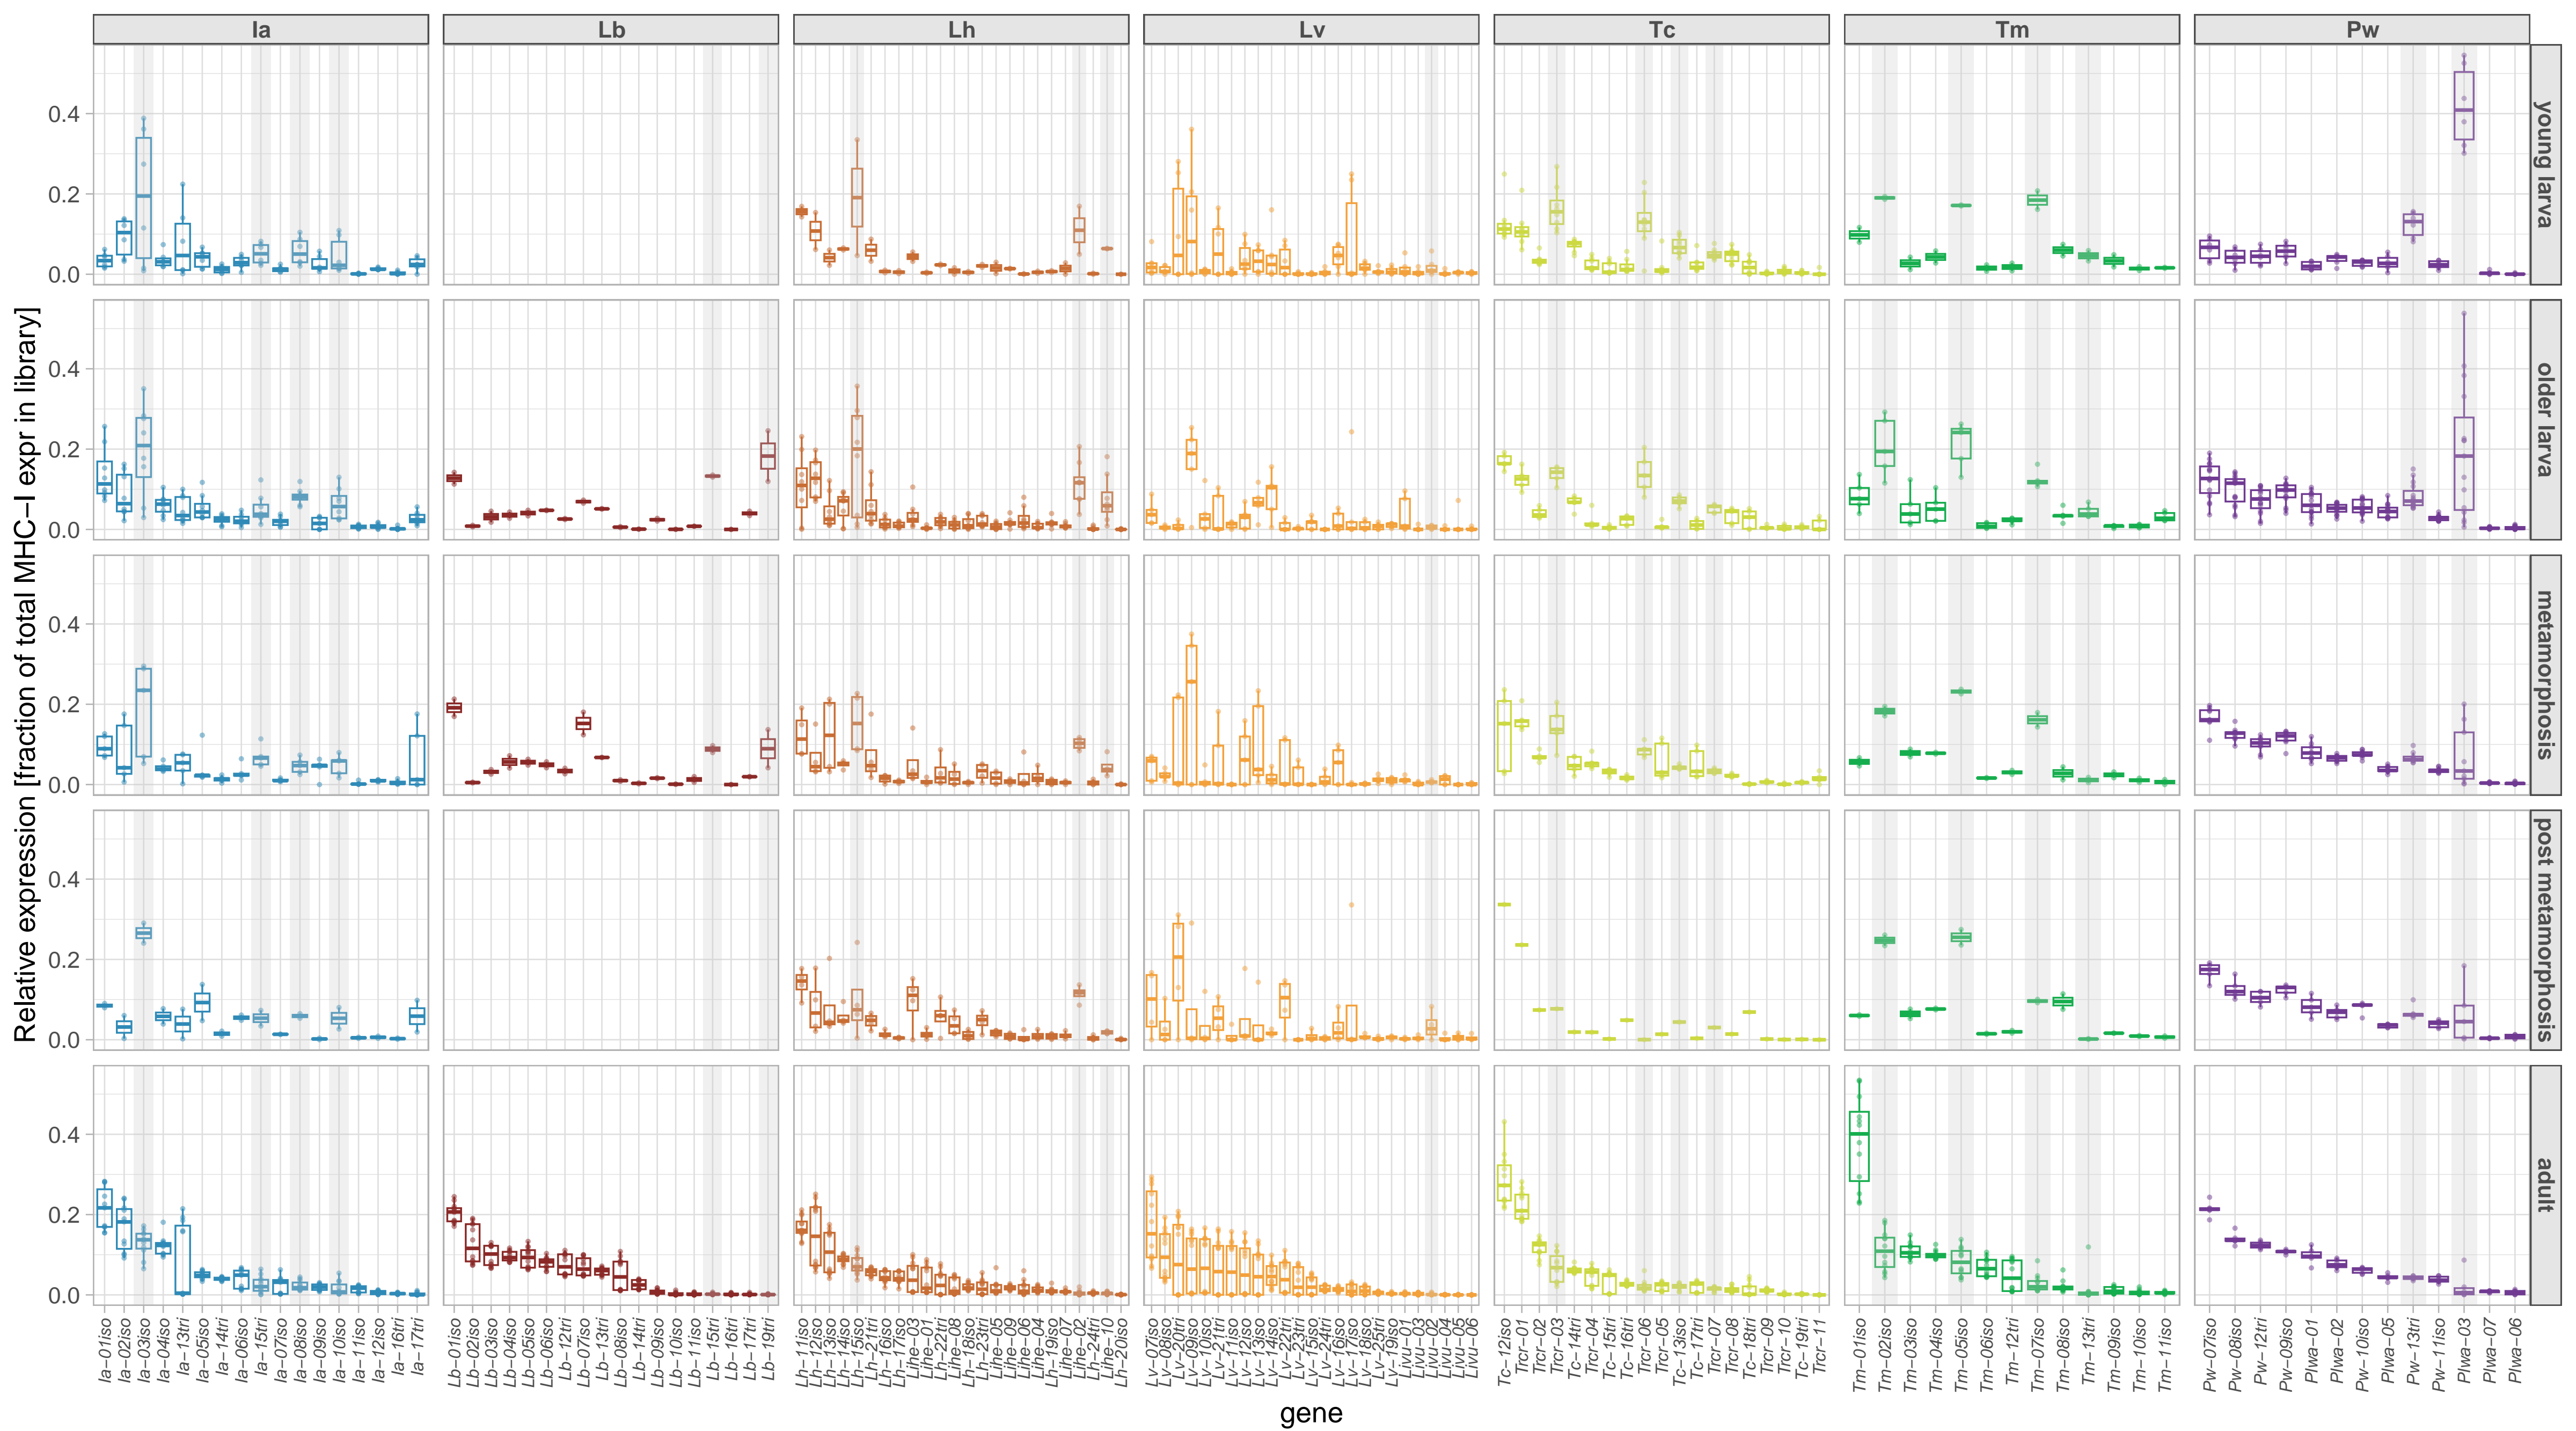

**Fig. S6. Expression of the G+T dataset MHC-I sequences through ontogeny.** Relative expression, i.e., FPKM for a particular cluster representative divided by the total MHC-I FPKM in a library. Boxplots show medians, interquartile and total ranges. Grey stripes indicate putative nonclassical (MHC-Ib) sequences identified as described in the text. Note, that for genes *Linn-02* and *Trcr-07* the pattern of higher relative expression in larval stages, visible when mapping RNA-seq data to genomes and used to classify them as MHC-Ib, is not clearly visible when mapping was performed to the broader set of G+T reference sequences. Species abbreviations: Ia – *I. alpestris*, Lb – *L. boscai*, Lh - *L. helveticus*, Lv - *L. vulgaris*, Pw – *P. waltl*, Tc – *T. cristatus*, Tm - *T. marmoratus*.

Relative expression [fraction of total MHC-I expr in library]

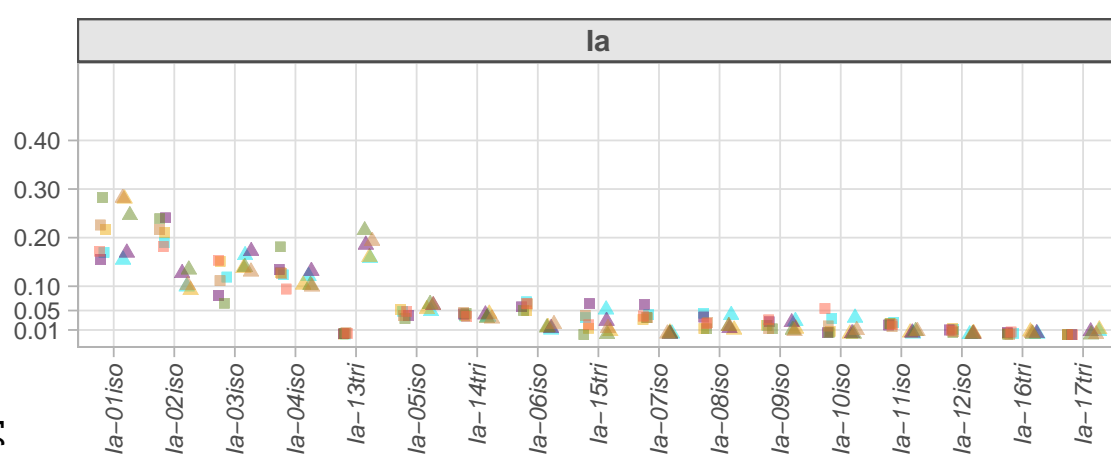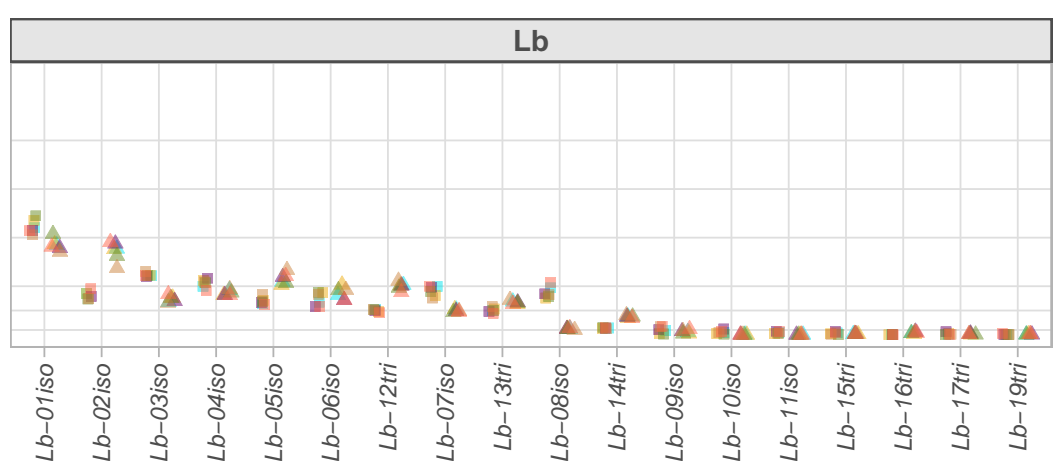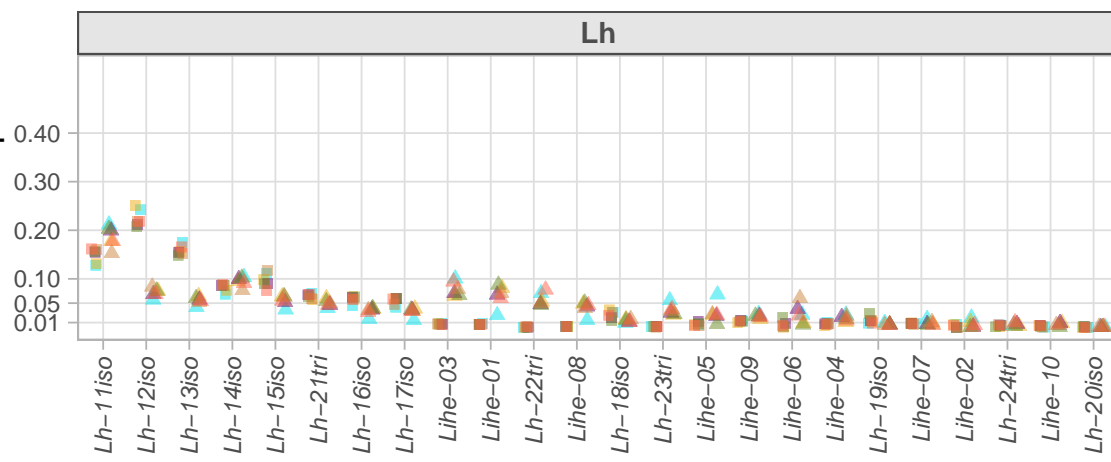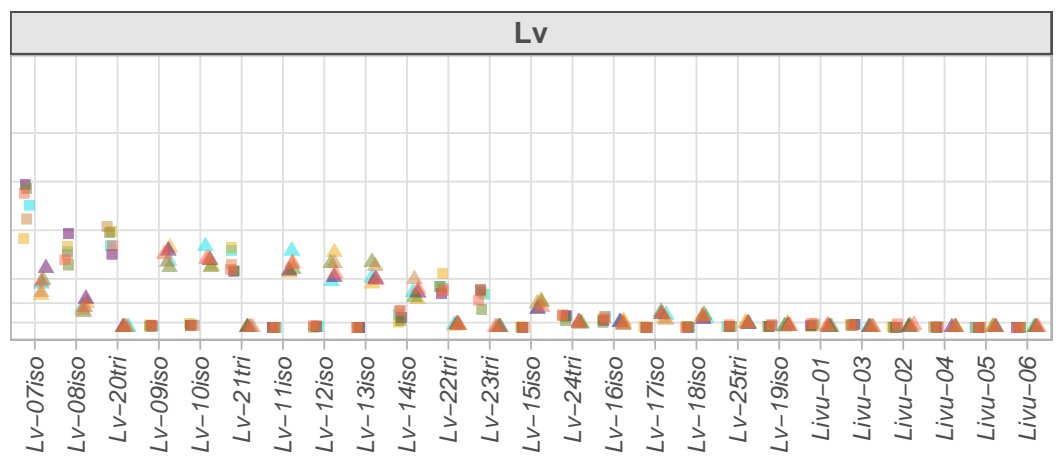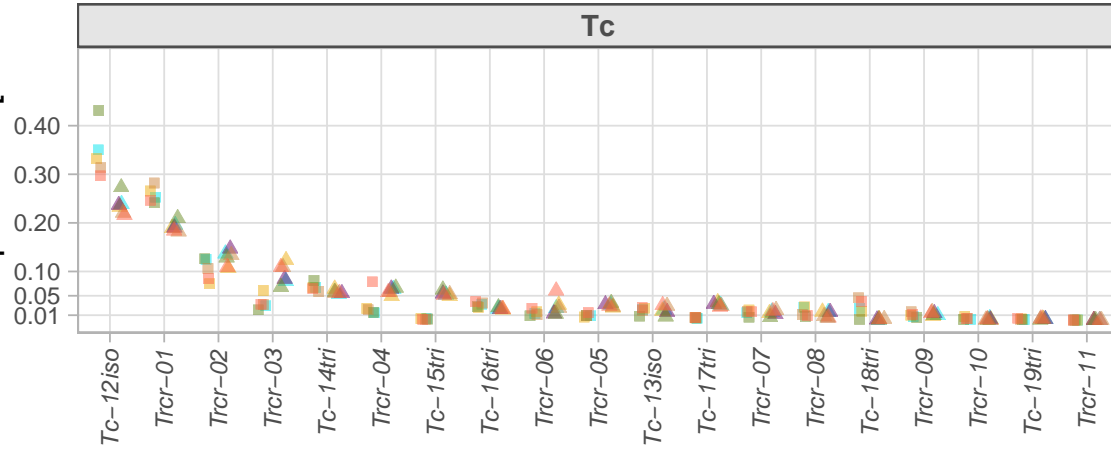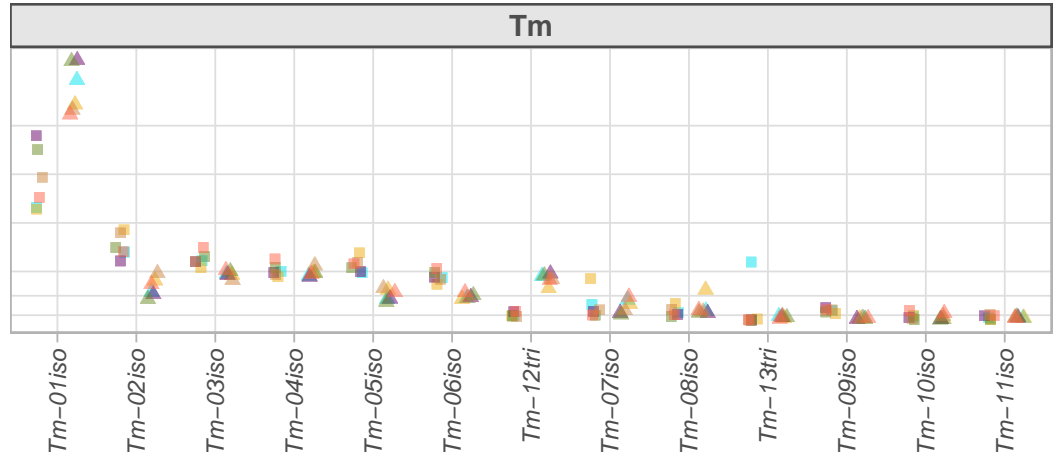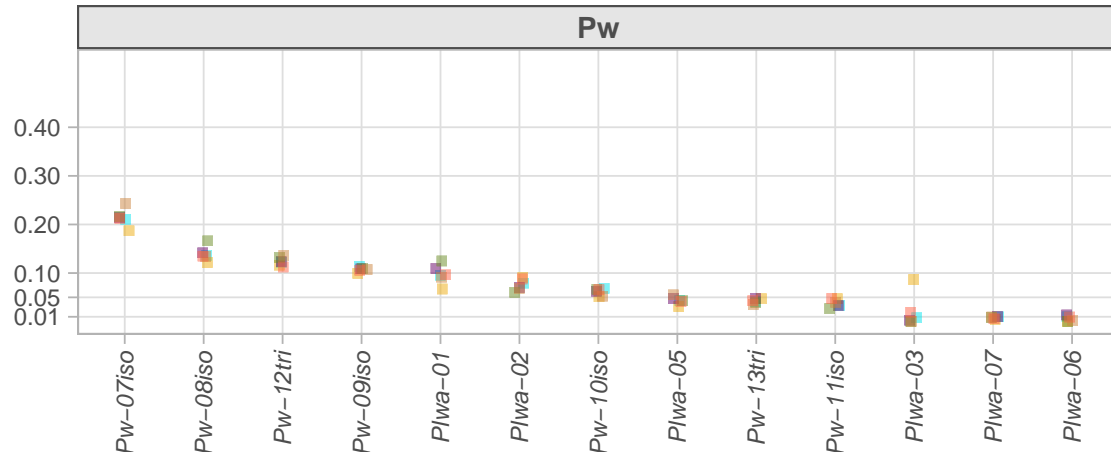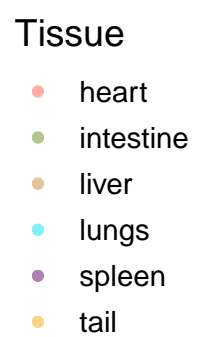

gene

**Fig. S7. Expression of MHC-I sequences in adult tissues.** Relative expression, i.e., FPKM for a particular cluster representative divided by the total MHC-I FPKM in a library. RNA-seq libraries from different tissues are indicated with different colors and individuals with different shapes. Species abbreviations: Ia – *I. alpestris*, Lb – *L. boscai*, Lh - *L. helveticus*, Lv - *L. vulgaris*, Pw – *P. waltl*, Tc – *T. cristatus*, Tm - *T. marmoratus*. Sequence names correspond to those in Fig. 4, S1-S5. Note, that the cluster represented by the gene *Phva-03* included also another gene annotated in the genome – *Phva-04*.

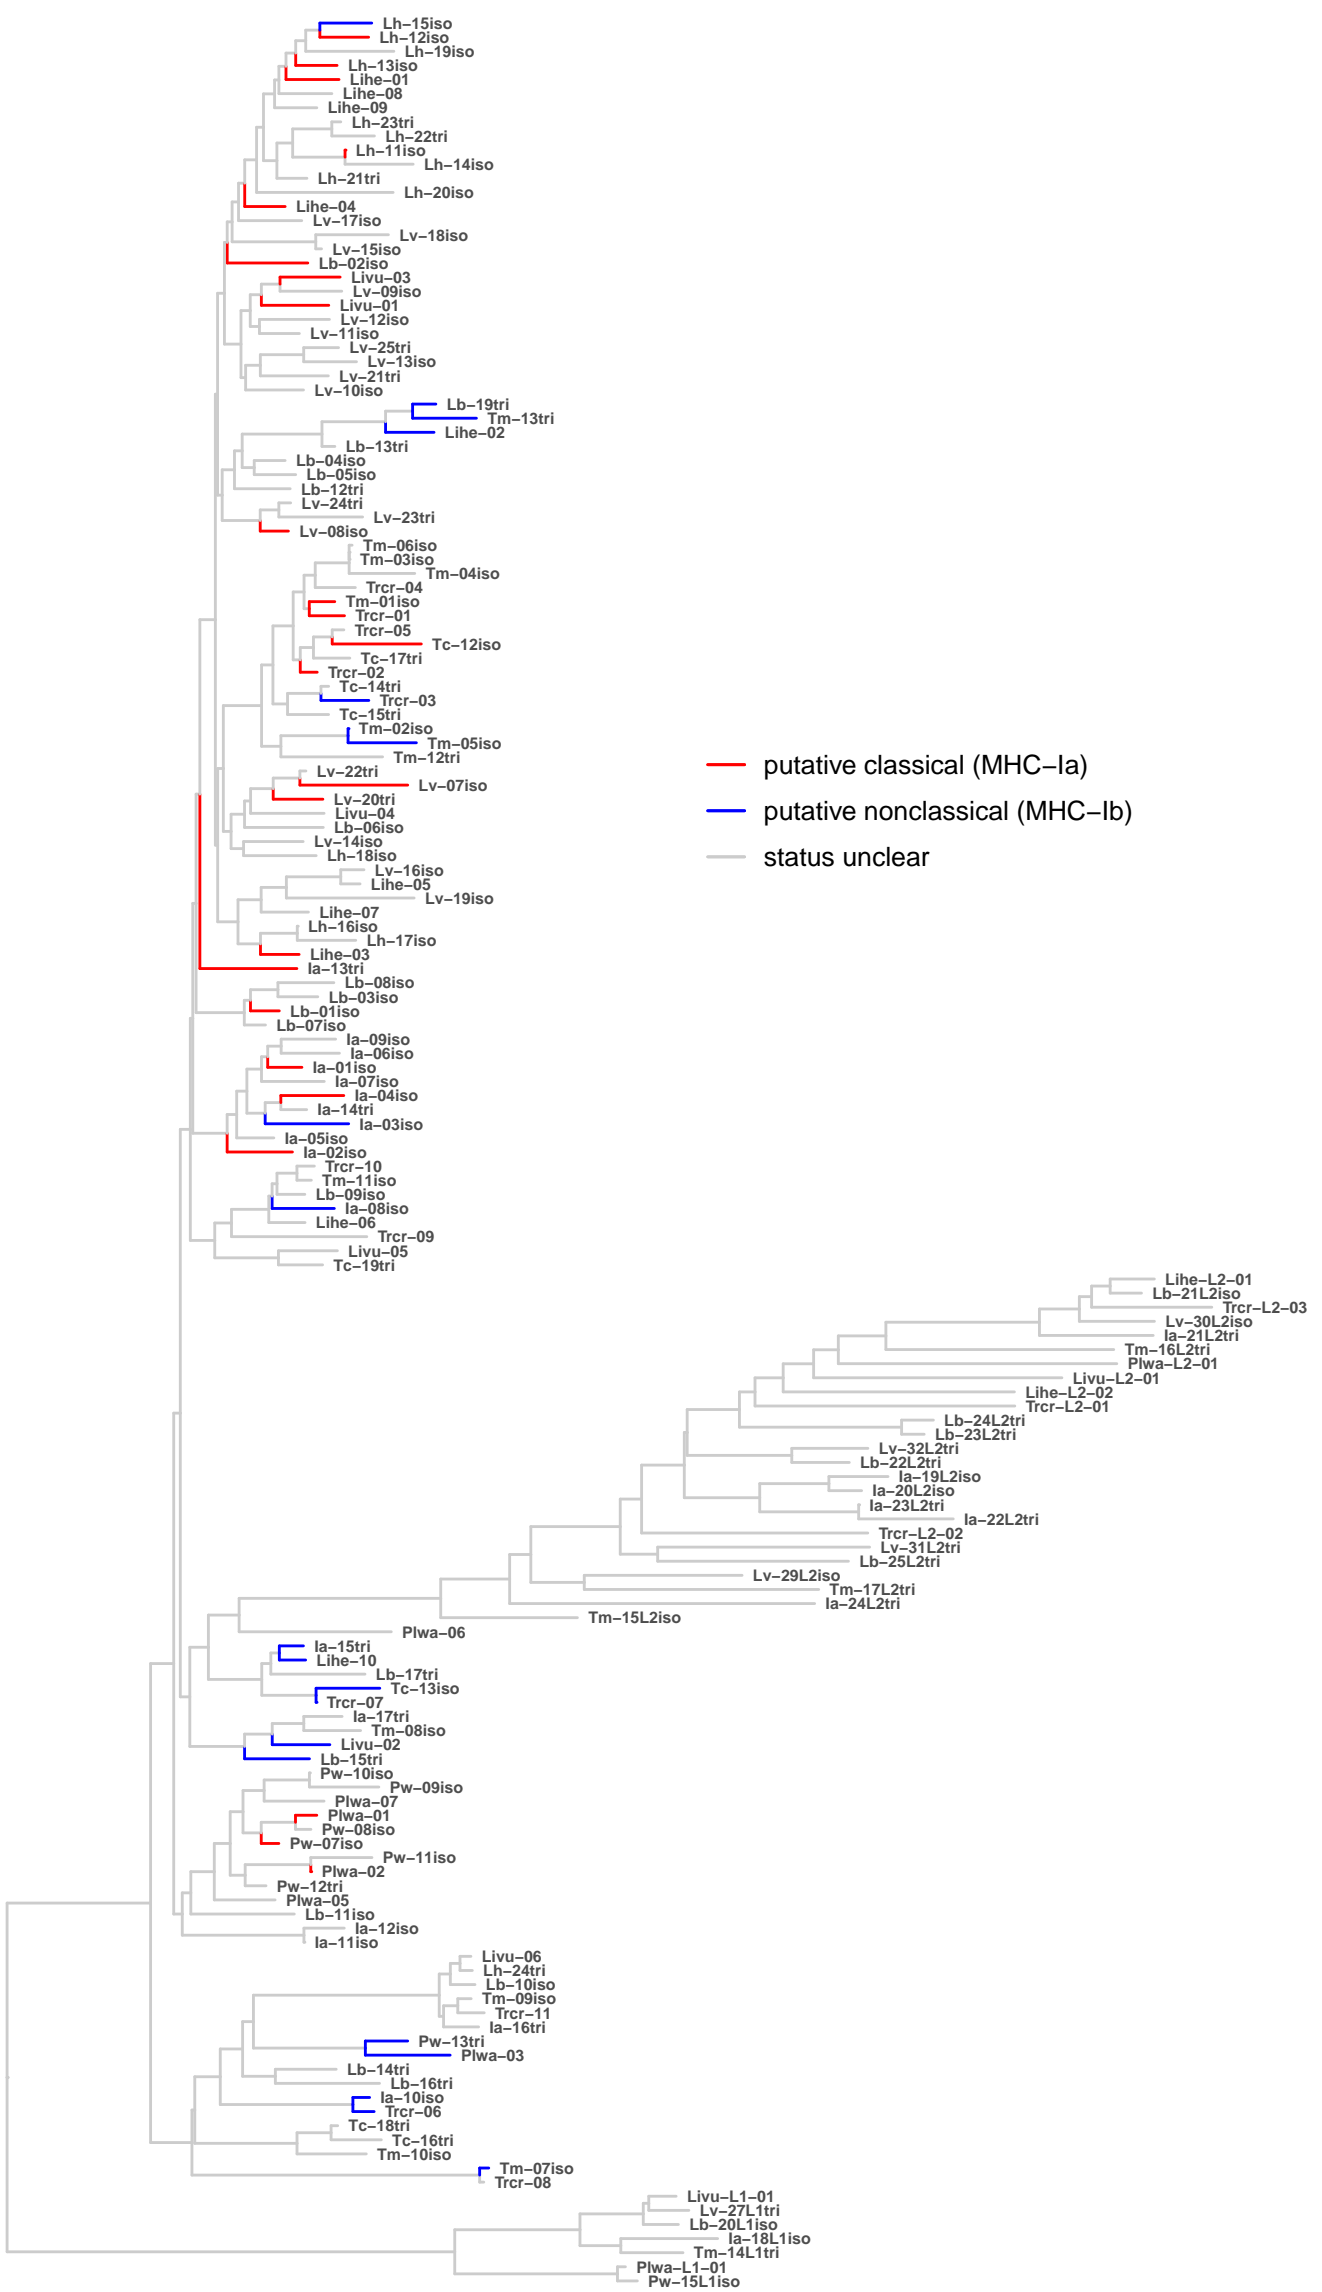



**Fig. S8. Position of putative classical and nonclassical MHC-I sequences on phylogeny from**

**Fig. S1.** Putative classical (MHC-Ia) and nonclassical (MHC-Ib) sequences were identified as described in the text and their branches are marked red and blue, respectively. The remaining sequences which status is unclear, as well as MHC-I-like sequences, are marked in gray.

Polymorphism – updated primers

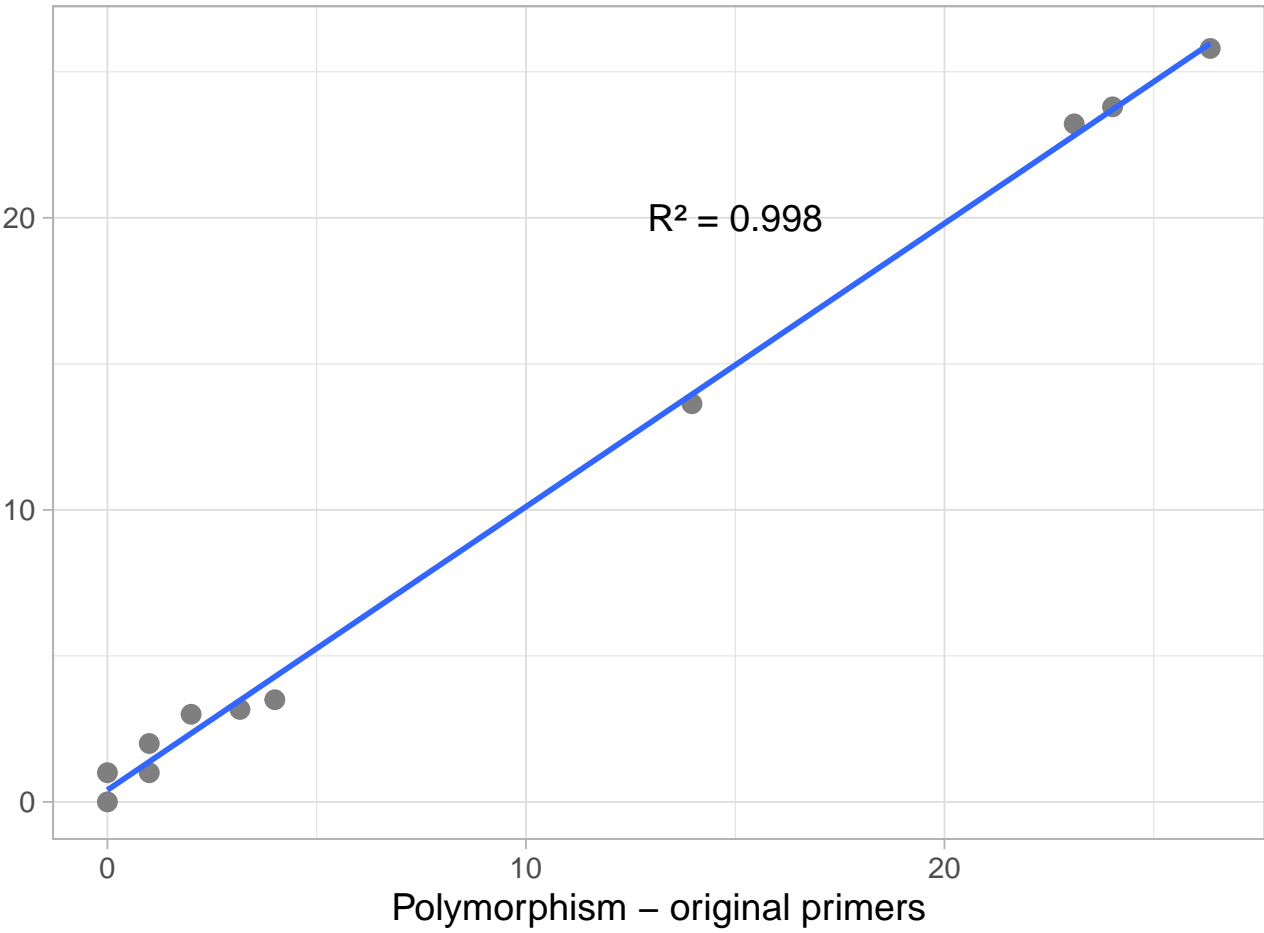

$R^2 = 0.998$

Polymorphism – original primers

**Fig. S9. Polymorphism of MHC-I genes in *T. cristatus* estimated with previously used and updated primers.** Twenty four individuals that were analysed previously by Palomar et al. (2021, original primers) were genotyped again using primers updated so that they would match exon 2 sequences of all genes annotated in the genome (updated primers). Polymorphism of each gene in both datasets was estimated as described in Materials and Methods and in Supplementary Materials.

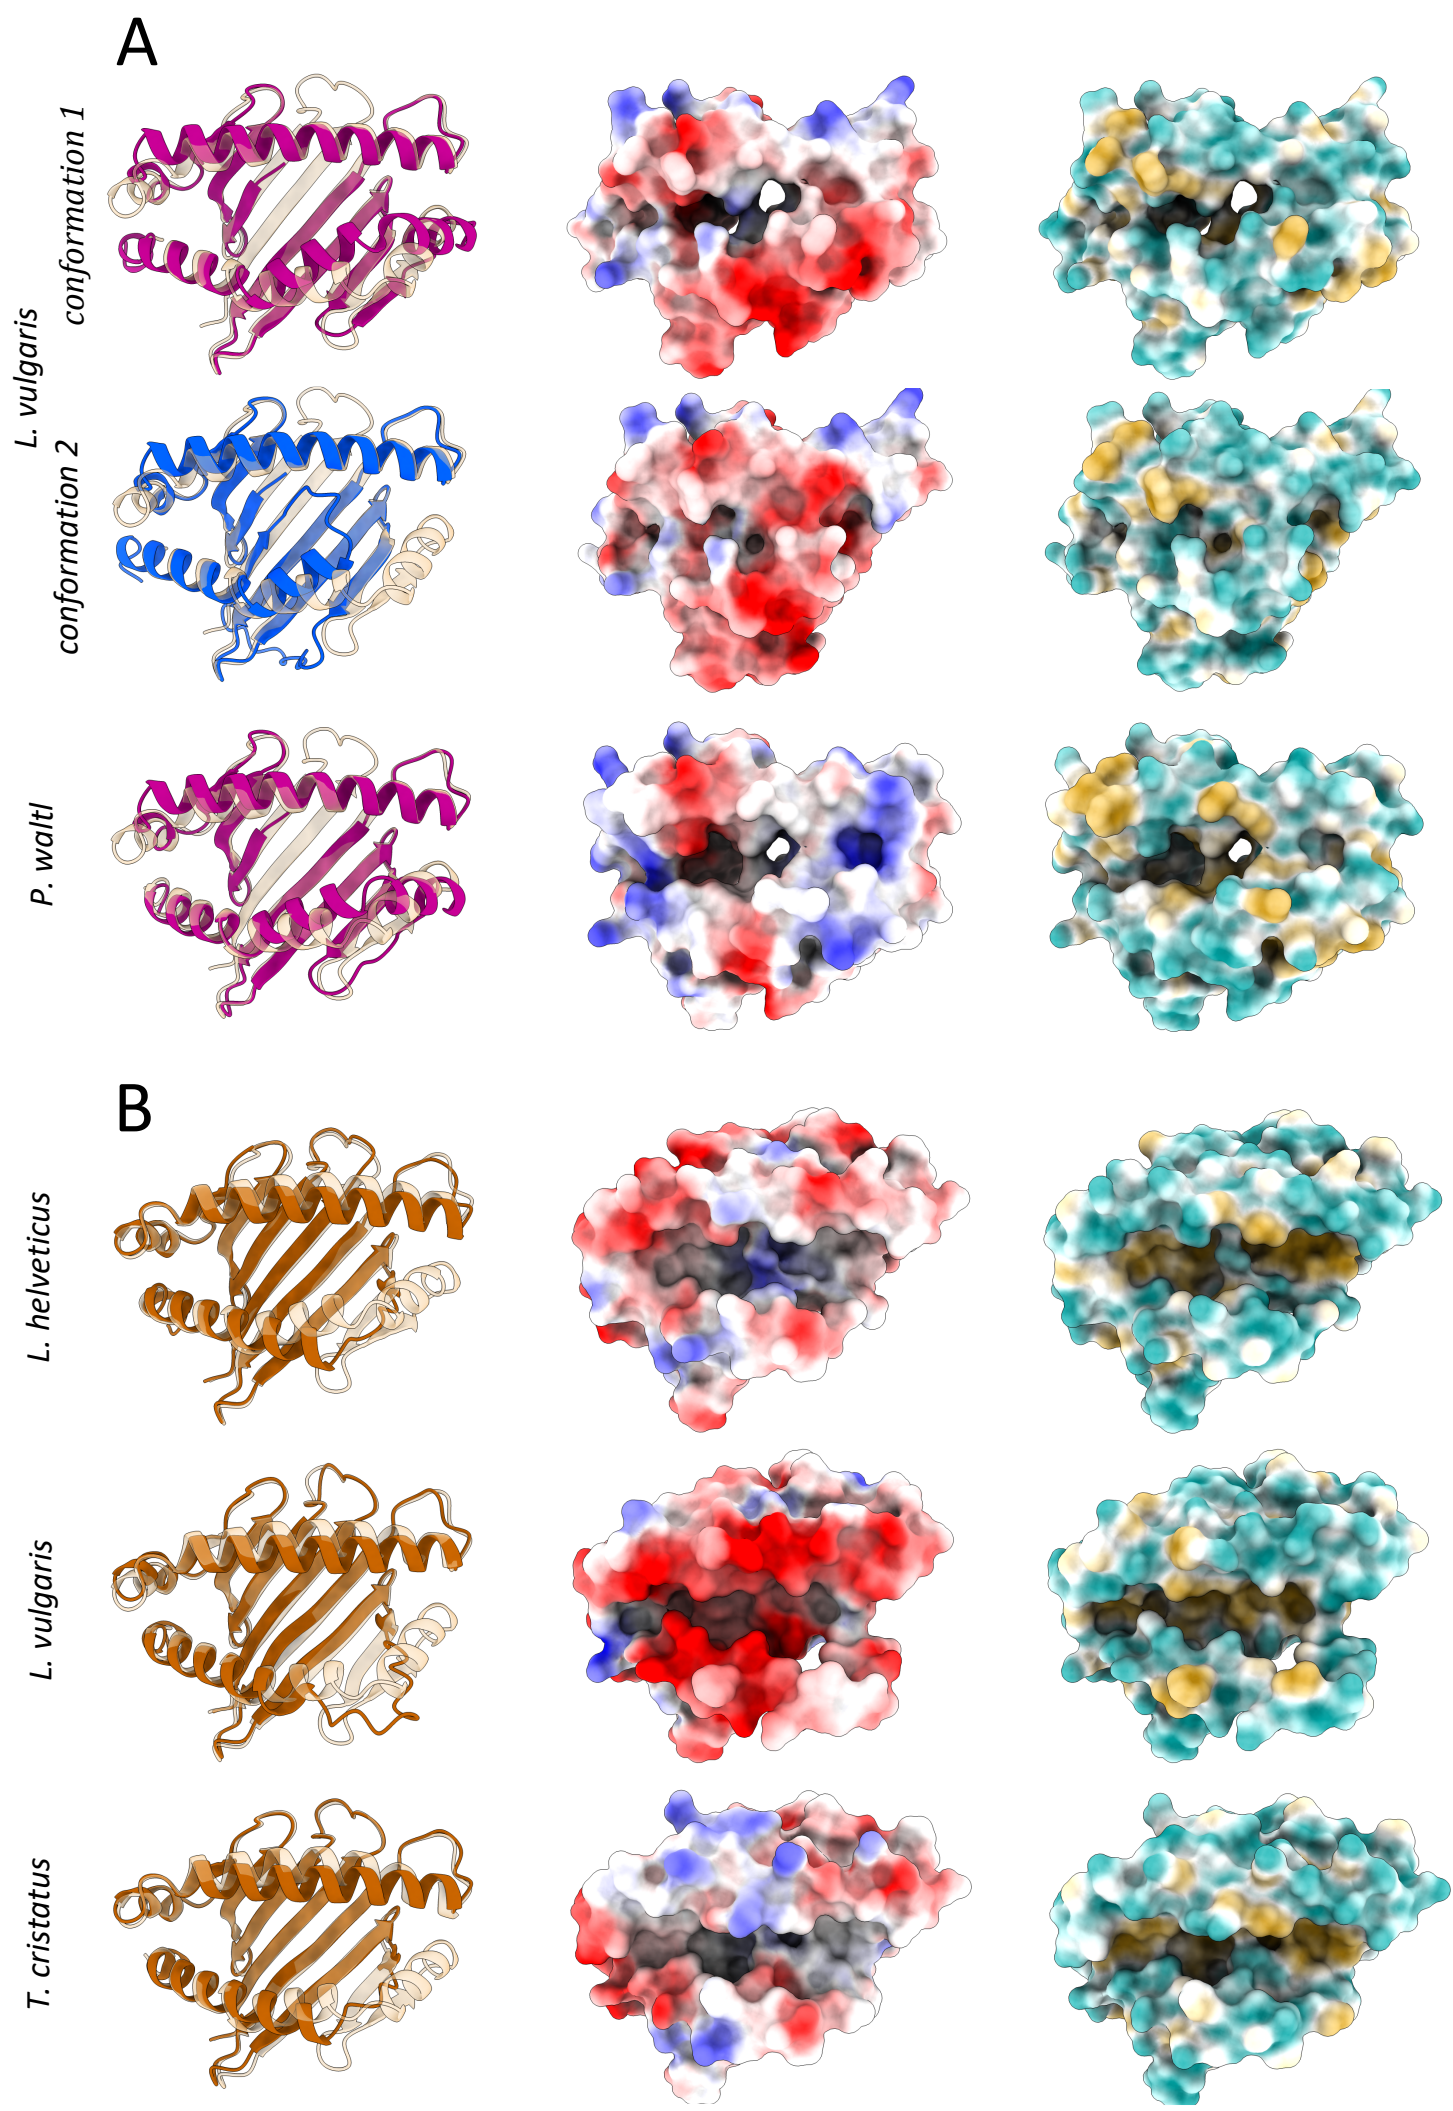

**Fig. S10. Top views of  $\alpha 1$ - $\alpha 2$  domains of a) MHC-I-like1 and b) MHC-I-like2 molecules,** generated with Alphafold3. Left hand-side structures: ribbon models of MHC-I-like molecules (magenta – top conformation of MHC-I-like1, blue – alternative MHC-I-like1 conformation, brown - top conformation of MHC-I-like2), overlaid on classical molecules of respective species. Middle structure: Coulombic electrostatic potential mapped on the molecular surface, with red for negative and blue for positive potential. Right hand-side structures: lipophilicity potential mapped on the molecular surface, with cyan most hydrophilic and goldenrod most lipophilic.

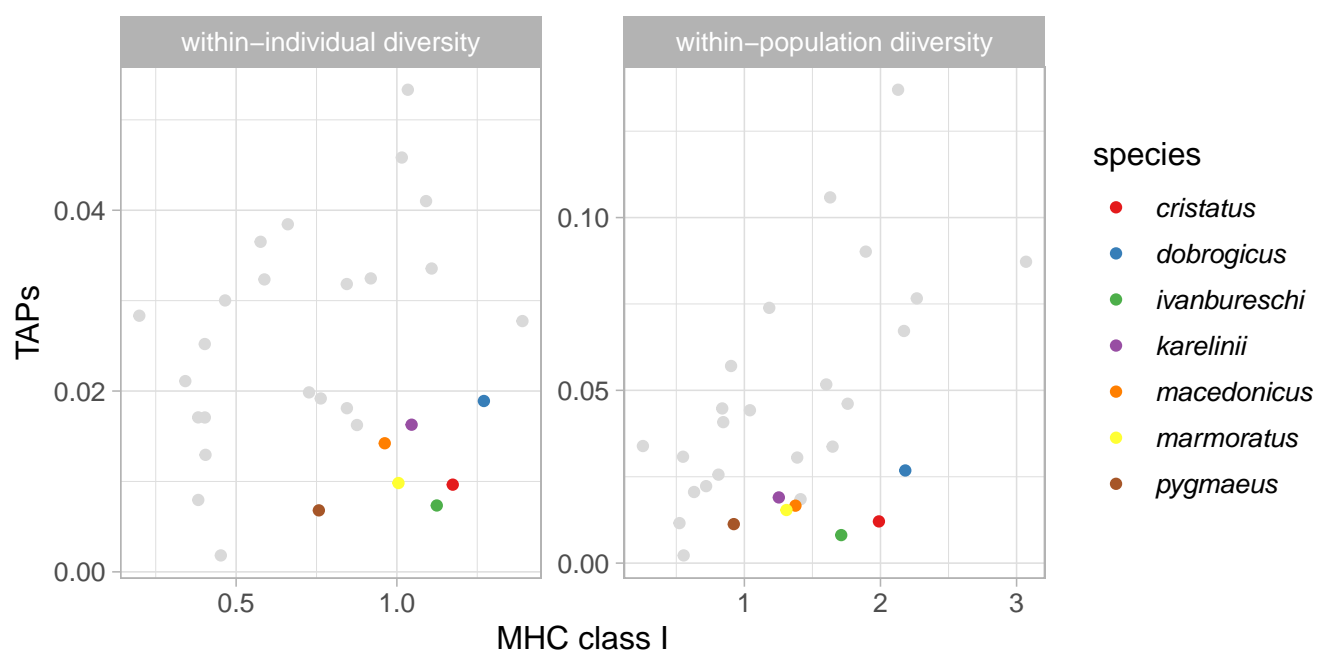

**Fig. S11. The relationship between MHC-I and *TAP* (*TAP1* + *TAP2*) diversity in *Triturus* newts.** Estimates of phylogenetic alpha (within-individual) and gamma (within-population) diversity for 30 salamander species are from Palomar et al. (2021). There is a tendency for *Triturus* species (color-coded) to show low *TAP* diversity and little evidence for a correlation between MHC-I and *TAP* diversity, as opposed to the remaining 23 species representing 15 genera and six families.
