# Supplementary material for: MHC in newts illuminates the evolutionary dynamics of complex regions in giant genomes
Source: HighWire-hosted journal article supplement (doi:10.1101/gr.281127.125), 2026-01-12
Supplement: Supplemental_Tables.xlsx [file Supplemental_Tables.xlsx]

## Sheet: S1
Table S1. Pairwise amino acid distances between MHC-I and MHC-I-like proteins encoded by genes annotated in newt genomes.
The table shows uncorrected (p) distances
Lihe - L. helveticus, Livu - L. vulgaris, Plwa - P. waltl, Trcr - T. cristatus
L1 - MHC-I-like1; L2 - MHC-I-like2
	Lihe-01	Lihe-02	Lihe-03	Lihe-04	Lihe-05	Lihe-06	Lihe-07	Lihe-08	Lihe-09	Lihe-10	Lihe-L2-01	Lihe-L2-02	Livu-01	Livu-02	Livu-03	Livu-04	Livu-05	Livu-06	Livu-L1-01	Livu-L2-01	Plwa-01	Plwa-02	Plwa-03	Plwa-05	Plwa-06	Plwa-07	Plwa-L1-01	Plwa-L2-01	Trcr-01	Trcr-02	Trcr-03	Trcr-04	Trcr-05	Trcr-06	Trcr-07	Trcr-08	Trcr-09	Trcr-10	Trcr-11	Trcr-L2-01	Trcr-L2-02	Trcr-L2-03
Lihe-01	0
Lihe-02	0.33	0
Lihe-03	0.15	0.31	0
Lihe-04	0.14	0.32	0.13	0
Lihe-05	0.18	0.34	0.17	0.16	0
Lihe-06	0.2	0.36	0.18	0.16	0.2	0
Lihe-07	0.16	0.3	0.15	0.16	0.16	0.2	0
Lihe-08	0.13	0.31	0.15	0.13	0.17	0.16	0.13	0
Lihe-09	0.12	0.32	0.12	0.12	0.16	0.18	0.13	0.1	0
Lihe-10	0.23	0.36	0.2	0.21	0.24	0.24	0.22	0.23	0.2	0
Lihe-L2-01	0.55	0.56	0.56	0.56	0.57	0.57	0.54	0.57	0.55	0.53	0
Lihe-L2-02	0.52	0.52	0.52	0.53	0.55	0.55	0.52	0.52	0.53	0.52	0.44	0
Livu-01	0.15	0.34	0.17	0.16	0.21	0.2	0.21	0.2	0.18	0.22	0.57	0.54	0
Livu-02	0.23	0.34	0.22	0.21	0.23	0.24	0.22	0.23	0.22	0.26	0.58	0.53	0.22	0
Livu-03	0.17	0.34	0.18	0.18	0.22	0.23	0.21	0.18	0.19	0.23	0.57	0.53	0.15	0.22	0
Livu-04	0.18	0.31	0.15	0.14	0.2	0.2	0.17	0.15	0.16	0.23	0.55	0.52	0.17	0.24	0.2	0
Livu-05	0.25	0.37	0.25	0.24	0.27	0.24	0.25	0.23	0.23	0.28	0.57	0.54	0.26	0.29	0.26	0.27	0
Livu-06	0.39	0.4	0.38	0.37	0.4	0.39	0.37	0.38	0.38	0.39	0.57	0.55	0.4	0.39	0.41	0.41	0.41	0
Livu-L1-01	0.62	0.65	0.64	0.62	0.63	0.63	0.64	0.62	0.63	0.63	0.72	0.7	0.62	0.65	0.61	0.63	0.64	0.66	0
Livu-L2-01	0.57	0.54	0.55	0.57	0.57	0.57	0.56	0.57	0.56	0.55	0.42	0.38	0.58	0.59	0.57	0.56	0.56	0.57	0.71	0
Plwa-01	0.23	0.36	0.21	0.17	0.23	0.17	0.19	0.17	0.19	0.24	0.55	0.53	0.23	0.25	0.23	0.21	0.23	0.38	0.63	0.55	0
Plwa-02	0.22	0.34	0.2	0.17	0.22	0.2	0.21	0.19	0.2	0.25	0.55	0.52	0.23	0.24	0.23	0.21	0.23	0.39	0.64	0.55	0.16	0
Plwa-03	0.35	0.22	0.35	0.35	0.36	0.38	0.35	0.35	0.35	0.4	0.58	0.53	0.37	0.36	0.38	0.36	0.4	0.38	0.66	0.57	0.37	0.36	0
Plwa-05	0.22	0.33	0.2	0.17	0.21	0.2	0.19	0.19	0.19	0.24	0.55	0.53	0.21	0.23	0.21	0.21	0.23	0.36	0.63	0.56	0.15	0.15	0.34	0
Plwa-06	0.28	0.4	0.28	0.27	0.31	0.28	0.27	0.28	0.27	0.27	0.56	0.56	0.28	0.31	0.31	0.3	0.31	0.42	0.68	0.58	0.28	0.25	0.42	0.26	0
Plwa-07	0.23	0.33	0.2	0.19	0.23	0.21	0.18	0.19	0.2	0.26	0.54	0.53	0.23	0.26	0.25	0.21	0.25	0.37	0.63	0.56	0.12	0.16	0.35	0.15	0.27	0
Plwa-L1-01	0.62	0.63	0.63	0.61	0.61	0.61	0.62	0.6	0.62	0.62	0.67	0.67	0.61	0.64	0.62	0.61	0.6	0.64	0.31	0.68	0.6	0.61	0.63	0.61	0.65	0.61	0
Plwa-L2-01	0.58	0.56	0.55	0.58	0.58	0.57	0.55	0.58	0.57	0.56	0.47	0.41	0.57	0.58	0.57	0.56	0.57	0.56	0.72	0.41	0.57	0.55	0.59	0.55	0.58	0.57	0.7	0
Trcr-01	0.19	0.33	0.18	0.17	0.2	0.22	0.2	0.17	0.18	0.23	0.55	0.52	0.23	0.25	0.2	0.19	0.26	0.38	0.62	0.55	0.2	0.21	0.36	0.18	0.3	0.22	0.6	0.55	0
Trcr-02	0.18	0.32	0.15	0.17	0.18	0.21	0.17	0.17	0.17	0.23	0.56	0.53	0.2	0.23	0.2	0.17	0.26	0.38	0.63	0.55	0.2	0.21	0.34	0.2	0.3	0.21	0.61	0.56	0.09	0
Trcr-03	0.2	0.34	0.21	0.19	0.23	0.23	0.19	0.19	0.19	0.25	0.55	0.55	0.21	0.24	0.24	0.19	0.27	0.39	0.62	0.58	0.22	0.23	0.37	0.2	0.3	0.22	0.62	0.59	0.17	0.15	0
Trcr-04	0.17	0.33	0.17	0.16	0.19	0.21	0.17	0.16	0.16	0.23	0.57	0.53	0.21	0.24	0.2	0.18	0.24	0.38	0.63	0.55	0.21	0.22	0.35	0.19	0.29	0.2	0.61	0.58	0.1	0.09	0.15	0
Trcr-05	0.2	0.33	0.19	0.19	0.21	0.21	0.19	0.18	0.17	0.25	0.56	0.53	0.23	0.24	0.22	0.19	0.23	0.38	0.63	0.55	0.21	0.22	0.37	0.2	0.3	0.22	0.61	0.56	0.08	0.07	0.18	0.11	0
Trcr-06	0.34	0.36	0.31	0.32	0.35	0.32	0.31	0.3	0.3	0.33	0.58	0.54	0.34	0.34	0.33	0.33	0.33	0.35	0.63	0.56	0.3	0.32	0.35	0.31	0.38	0.3	0.62	0.56	0.33	0.33	0.35	0.33	0.34	0
Trcr-07	0.23	0.35	0.2	0.22	0.25	0.25	0.2	0.22	0.22	0.12	0.53	0.53	0.23	0.26	0.23	0.23	0.28	0.38	0.64	0.55	0.24	0.26	0.38	0.24	0.29	0.24	0.6	0.56	0.23	0.22	0.23	0.21	0.23	0.31	0
Trcr-08	0.39	0.38	0.38	0.36	0.38	0.4	0.38	0.39	0.38	0.38	0.58	0.57	0.39	0.4	0.41	0.39	0.42	0.39	0.67	0.58	0.39	0.4	0.43	0.37	0.43	0.39	0.64	0.6	0.39	0.38	0.4	0.38	0.4	0.39	0.38	0
Trcr-09	0.25	0.36	0.23	0.23	0.26	0.22	0.24	0.21	0.23	0.28	0.57	0.55	0.25	0.29	0.27	0.25	0.26	0.38	0.64	0.56	0.24	0.22	0.38	0.23	0.31	0.23	0.61	0.58	0.23	0.23	0.25	0.23	0.24	0.34	0.26	0.4	0
Trcr-10	0.22	0.35	0.2	0.18	0.2	0.09	0.2	0.18	0.2	0.25	0.56	0.54	0.21	0.25	0.24	0.21	0.24	0.38	0.62	0.55	0.16	0.2	0.37	0.21	0.29	0.21	0.6	0.56	0.21	0.21	0.24	0.21	0.21	0.33	0.26	0.4	0.21	0
Trcr-11	0.41	0.41	0.4	0.39	0.42	0.41	0.39	0.4	0.4	0.41	0.56	0.56	0.41	0.41	0.42	0.42	0.42	0.1	0.67	0.57	0.39	0.4	0.4	0.38	0.43	0.39	0.65	0.57	0.41	0.41	0.41	0.4	0.41	0.37	0.39	0.4	0.39	0.39	0
Trcr-L2-01	0.55	0.52	0.53	0.55	0.57	0.55	0.54	0.55	0.54	0.53	0.45	0.37	0.55	0.56	0.55	0.54	0.54	0.58	0.72	0.4	0.53	0.54	0.53	0.55	0.57	0.54	0.67	0.43	0.54	0.54	0.54	0.54	0.54	0.55	0.53	0.59	0.56	0.54	0.57	0
Trcr-L2-02	0.56	0.54	0.54	0.55	0.57	0.58	0.54	0.57	0.56	0.53	0.44	0.42	0.56	0.55	0.55	0.54	0.57	0.54	0.72	0.43	0.55	0.55	0.55	0.55	0.57	0.54	0.69	0.45	0.55	0.56	0.54	0.55	0.57	0.56	0.55	0.58	0.57	0.56	0.54	0.42	0
Trcr-L2-03	0.56	0.54	0.57	0.58	0.57	0.56	0.55	0.56	0.56	0.56	0.2	0.43	0.57	0.57	0.57	0.56	0.57	0.57	0.7	0.45	0.55	0.56	0.57	0.55	0.58	0.54	0.65	0.45	0.56	0.56	0.55	0.57	0.56	0.56	0.55	0.59	0.56	0.56	0.56	0.46	0.43	0

## Sheet: S2
Table S2. The number of individuals at various developmental stages for which RNAseq data were obtained.
Note that, for many individuals, libraries from more than one body part/tissue were sequenced (see text and Table S4).
Developmental stages according to Shi et al. (1995): Young larvae - 38-44, Older larvae - 45-47, Metamorphosis - 48-49, Metamorph - 50.
If offspring of more than one female was analyzed, numbers are separated by the ‘+’ sign.
Species	Young larvae	Older larvae	Metamorphosis	Metamorph	Adult
I. alpestris	2 + 2	1 + 1	1 + 2	1 + 1	2
L. boscai	-	1	1	-	2
L. helveticus	1 + 1	3 + 4	2 + 2	2 + 2	2
L. vulgaris	2 + 2	1 + 1	1 + 1	1 + 1	2
P. waltl	2 + 1	1 + 2	2	1	1
T. cristatus	2 + 2	1 + 1	2	1	2
T. marmoratus	1 + 1	3 + 2	2	2	2

## Sheet: S3
Table S3. Geographic origin of adult newts used in the study.
Ind ID - individual ID in an internal database.
Species	Ind ID	Country	Locality	Latitude	Longitude
I. alpestris	26088	Poland	Kraków_Rudno	50.065	19.588
I. alpestris	26089	Poland	Kraków_Rudno	50.065	19.588
L. boscai	26499	Spain	Lamuño	43.563	-6.2
L. boscai	26500	Spain	Lamuño	43.563	-6.2
L. helveticus	26503	Spain	La Manjoya	43.334	-5.868
L. helveticus	26504	Spain	La Manjoya	43.334	-5.868
L. vulgaris	26076	Poland	Kraków2	50.04	19.917
L. vulgaris	26077	Poland	Kraków2	50.04	19.917
T. cristatus	26078	Poland	Kraków2	50.04	19.917
T. cristatus	26079	Poland	Kraków2	50.04	19.917
T. marmoratus	26501	Spain	La Manjoya	43.334	-5.868
T. marmoratus	26502	Spain	La Manjoya	43.334	-5.868

## Sheet: S4
Table S4. RNAseq datasets (libraries) used in the study.
Dev. stage - developmental stage according to Shi et al. (1995), Dev. phase - broadly defined phase of the development,
Stage descr. - description of the morphological features defining the stage, Ind ID - individual ID in an internal database;
Mother ID - individual's mother ID in an internal database; Tissue/part - whole: whole larva,
anterior/posterior: RNA extracted separately from the anterior and posterior part of the larva, '
middle: trunk with limbs, without head and tail, middle_organs: part of the trunk with the organs was dissected, while avoiding skin and spine,
M read pairs - millions of read pers per library after quality control and trimming
Genus	Species	Dev. phase	Dev. stage	Stage descr.	Ind ID	Mother ID	Tissue/part	M read pairs
Ichthyosaura	alpestris	young larva	39	three_fingers	26115	26088	whole	16.9
Ichthyosaura	alpestris	young larva	39	three_fingers	26118	26089	whole	13.6
Ichthyosaura	alpestris	young larva	42	two_toes	26144	26088	anterior	14.1
Ichthyosaura	alpestris	young larva	42	two_toes	26144	26088	posterior	16.1
Ichthyosaura	alpestris	young larva	42	two_toes	26146	26089	anterior	18.6
Ichthyosaura	alpestris	young larva	42	two_toes	26146	26089	posterior	15.3
Ichthyosaura	alpestris	older larva	47	full_dev	26239	26088	middle_organs	18
Ichthyosaura	alpestris	older larva	47	full_dev	26239	26088	tail	17.5
Ichthyosaura	alpestris	older larva	47	full_dev	26241	26089	middle_organs	16.4
Ichthyosaura	alpestris	older larva	47	full_dev	26241	26089	tail	17.1
Ichthyosaura	alpestris	metamorphosis	49	mid_meta	26404	26089	middle_organs	17.3
Ichthyosaura	alpestris	metamorphosis	49	mid_meta	26404	26089	tail	19.6
Ichthyosaura	alpestris	metamorphosis	49	mid_meta	26406	26089	middle_organs	17.7
Ichthyosaura	alpestris	metamorphosis	49	mid_meta	26406	26089	tail	17.4
Ichthyosaura	alpestris	metamorphosis	49	mid_meta	26417	26088	middle	25
Ichthyosaura	alpestris	post metamorphosis	50	post_meta	26407	26089	middle	26.4
Ichthyosaura	alpestris	post metamorphosis	50	post_meta	26408	26088	middle	23.8
Ichthyosaura	alpestris	adult	51	adult	26088	-	lungs	14.8
Ichthyosaura	alpestris	adult	51	adult	26088	-	tail	18.9
Ichthyosaura	alpestris	adult	51	adult	26088	-	spleen	11.5
Ichthyosaura	alpestris	adult	51	adult	26088	-	intestine	19.1
Ichthyosaura	alpestris	adult	51	adult	26088	-	liver	14.4
Ichthyosaura	alpestris	adult	51	adult	26088	-	heart	17.7
Ichthyosaura	alpestris	adult	51	adult	26089	-	lungs	15.5
Ichthyosaura	alpestris	adult	51	adult	26089	-	tail	12
Ichthyosaura	alpestris	adult	51	adult	26089	-	spleen	14.4
Ichthyosaura	alpestris	adult	51	adult	26089	-	intestine	12.4
Ichthyosaura	alpestris	adult	51	adult	26089	-	liver	14.7
Lissotriton	boscai	older larva	47	full_dev	26528	26499	head	22.7
Lissotriton	boscai	older larva	47	full_dev	26528	26499	middle	25.6
Lissotriton	boscai	metamorphosis	48	pre_meta	26601	26499	head	22.7
Lissotriton	boscai	metamorphosis	48	pre_meta	26601	26499	middle	22.7
Lissotriton	boscai	adult	51	adult	26499	-	lungs	28.7
Lissotriton	boscai	adult	51	adult	26499	-	tail	23.6
Lissotriton	boscai	adult	51	adult	26499	-	spleen	25.9
Lissotriton	boscai	adult	51	adult	26499	-	intestine	25
Lissotriton	boscai	adult	51	adult	26499	-	liver	19.8
Lissotriton	boscai	adult	51	adult	26499	-	heart	25.1
Lissotriton	boscai	adult	51	adult	26500	-	lungs	19.7
Lissotriton	boscai	adult	51	adult	26500	-	tail	23.5
Lissotriton	boscai	adult	51	adult	26500	-	spleen	23.2
Lissotriton	boscai	adult	51	adult	26500	-	intestine	25.6
Lissotriton	boscai	adult	51	adult	26500	-	liver	27.4
Lissotriton	boscai	adult	51	adult	26500	-	heart	24.3
Lissotriton	helveticus	young larva	42	two_toes	26517	26504	anterior	20.5
Lissotriton	helveticus	young larva	44	four_toes	26515	26503	anterior	23.6
Lissotriton	helveticus	older larva	46	five_toes	26519	26503	head	26.3
Lissotriton	helveticus	older larva	46	five_toes	26519	26503	middle	26.3
Lissotriton	helveticus	older larva	46	five_toes	26520	26503	middle	23.3
Lissotriton	helveticus	older larva	46	five_toes	26522	26504	middle	28.8
Lissotriton	helveticus	older larva	47	full_dev	26532	26503	middle	21.4
Lissotriton	helveticus	older larva	47	full_dev	26534	26504	middle	20.2
Lissotriton	helveticus	older larva	47	full_dev	26577	26503	middle	21.1
Lissotriton	helveticus	older larva	47	full_dev	26606	26504	middle	25.8
Lissotriton	helveticus	metamorphosis	49	mid_meta	26543	26503	middle	27.1
Lissotriton	helveticus	metamorphosis	49	mid_meta	26565	26504	middle	21.6
Lissotriton	helveticus	metamorphosis	49	mid_meta	26596	26503	middle	23.5
Lissotriton	helveticus	metamorphosis	49	mid_meta	26607	26504	middle	25.6
Lissotriton	helveticus	post metamorphosis	50	post_meta	26568	26504	middle	27.4
Lissotriton	helveticus	post metamorphosis	50	post_meta	26573	26503	middle	22.4
Lissotriton	helveticus	post metamorphosis	50	post_meta	26600	26503	middle	23.2
Lissotriton	helveticus	post metamorphosis	50	post_meta	26609	26504	middle	24.9
Lissotriton	helveticus	adult	51	adult	26503	-	lungs	24.5
Lissotriton	helveticus	adult	51	adult	26503	-	tail	23
Lissotriton	helveticus	adult	51	adult	26503	-	spleen	20.8
Lissotriton	helveticus	adult	51	adult	26503	-	intestine	25.4
Lissotriton	helveticus	adult	51	adult	26503	-	liver	20
Lissotriton	helveticus	adult	51	adult	26503	-	heart	20.7
Lissotriton	helveticus	adult	51	adult	26504	-	lungs	25.9
Lissotriton	helveticus	adult	51	adult	26504	-	tail	21.9
Lissotriton	helveticus	adult	51	adult	26504	-	spleen	25.5
Lissotriton	helveticus	adult	51	adult	26504	-	intestine	22.7
Lissotriton	helveticus	adult	51	adult	26504	-	liver	24.5
Lissotriton	helveticus	adult	51	adult	26504	-	heart	31.9
Lissotriton	vulgaris	young larva	39	three_fingers	26081	26076	whole	13.9
Lissotriton	vulgaris	young larva	39	three_fingers	26082	26077	whole	16.6
Lissotriton	vulgaris	young larva	43	three_toes	26119	26076	anterior	13
Lissotriton	vulgaris	young larva	43	three_toes	26119	26076	posterior	15.2
Lissotriton	vulgaris	young larva	43	three_toes	26121	26077	anterior	13.7
Lissotriton	vulgaris	young larva	43	three_toes	26121	26077	posterior	16.6
Lissotriton	vulgaris	older larva	47	full_dev	26149	26076	middle_organs	11.8
Lissotriton	vulgaris	older larva	47	full_dev	26149	26076	tail	11.1
Lissotriton	vulgaris	older larva	47	full_dev	26151	26077	middle_organs	8.9
Lissotriton	vulgaris	older larva	47	full_dev	26151	26077	tail	11.9
Lissotriton	vulgaris	metamorphosis	49	mid_meta	26247	26076	middle_organs	9
Lissotriton	vulgaris	metamorphosis	49	mid_meta	26247	26076	tail	11.2
Lissotriton	vulgaris	metamorphosis	49	mid_meta	26253	26077	middle_organs	9.5
Lissotriton	vulgaris	metamorphosis	49	mid_meta	26253	26077	tail	12
Lissotriton	vulgaris	post metamorphosis	50	post_meta	26248	26076	middle	30.5
Lissotriton	vulgaris	post metamorphosis	50	post_meta	26250	26077	middle	25.1
Lissotriton	vulgaris	adult	51	adult	26076	-	lungs	14
Lissotriton	vulgaris	adult	51	adult	26076	-	tail	15.5
Lissotriton	vulgaris	adult	51	adult	26076	-	spleen	13.2
Lissotriton	vulgaris	adult	51	adult	26076	-	intestine	12.4
Lissotriton	vulgaris	adult	51	adult	26076	-	liver	15
Lissotriton	vulgaris	adult	51	adult	26076	-	heart	13.4
Lissotriton	vulgaris	adult	51	adult	26077	-	lungs	17.1
Lissotriton	vulgaris	adult	51	adult	26077	-	tail	17.9
Lissotriton	vulgaris	adult	51	adult	26077	-	spleen	16.5
Lissotriton	vulgaris	adult	51	adult	26077	-	intestine	18.7
Lissotriton	vulgaris	adult	51	adult	26077	-	liver	16.2
Lissotriton	vulgaris	adult	51	adult	26077	-	heart	18
Pleurodeles	waltl	young larva	39	three_fingers	25200	25183	head	15.8
Pleurodeles	waltl	young larva	39	three_fingers	25200	25183	middle	16.8
Pleurodeles	waltl	young larva	39	three_fingers	25204	25183	tail	20.3
Pleurodeles	waltl	young larva	43	three_toes	25215	25194	head	17.5
Pleurodeles	waltl	young larva	43	three_toes	25215	25194	middle	15.8
Pleurodeles	waltl	young larva	43	three_toes	25215	25194	tail	17.3
Pleurodeles	waltl	older larva	45	four_toes	25219	25194	head	15.3
Pleurodeles	waltl	older larva	45	four_toes	25219	25194	middle	13.7
Pleurodeles	waltl	older larva	45	four_toes	25219	25194	tail	14.9
Pleurodeles	waltl	older larva	45	four_toes	25219	25194	organs	16.4
Pleurodeles	waltl	older larva	46	five_toes	25231	25183	head	15.4
Pleurodeles	waltl	older larva	46	five_toes	25231	25183	middle	13.3
Pleurodeles	waltl	older larva	46	five_toes	25231	25183	tail	17.9
Pleurodeles	waltl	older larva	46	five_toes	25231	25183	intestine	16.7
Pleurodeles	waltl	older larva	46	five_toes	25231	25183	spleen	16.4
Pleurodeles	waltl	older larva	47	full_dev	25463	25194	head	14.5
Pleurodeles	waltl	older larva	47	full_dev	25463	25194	middle_skin_spine	15.4
Pleurodeles	waltl	older larva	47	full_dev	25463	25194	middle_organs	15.7
Pleurodeles	waltl	older larva	47	full_dev	25463	25194	tail	15.3
Pleurodeles	waltl	older larva	47	full_dev	25463	25194	intestine	16.4
Pleurodeles	waltl	older larva	47	full_dev	25463	25194	spleen	18.1
Pleurodeles	waltl	metamorphosis	48	pre_meta	25428	25194	head	16.5
Pleurodeles	waltl	metamorphosis	48	pre_meta	25428	25194	middle_skin_spine	15.8
Pleurodeles	waltl	metamorphosis	48	pre_meta	25428	25194	middle_organs	15.5
Pleurodeles	waltl	metamorphosis	48	pre_meta	25428	25194	tail	16.4
Pleurodeles	waltl	metamorphosis	48	pre_meta	25428	25194	intestine	17.3
Pleurodeles	waltl	metamorphosis	48	pre_meta	25428	25194	spleen	25.3
Pleurodeles	waltl	metamorphosis	49	mid_meta	25487	25194	tail	15.8
Pleurodeles	waltl	metamorphosis	49	mid_meta	25487	25194	intestine	18.7
Pleurodeles	waltl	metamorphosis	49	mid_meta	25487	25194	spleen	17.4
Pleurodeles	waltl	post metamorphosis	50	post_meta	25488	25194	tail	18.5
Pleurodeles	waltl	post metamorphosis	50	post_meta	25488	25194	intestine	17.5
Pleurodeles	waltl	post metamorphosis	50	post_meta	25488	25194	spleen	18.6
Pleurodeles	waltl	post metamorphosis	50	post_meta	25488	25194	heart	18.6
Pleurodeles	waltl	post metamorphosis	50	post_meta	25488	25194	liver	17.7
Pleurodeles	waltl	adult	51	adult	25183	-	tail	22.9
Pleurodeles	waltl	adult	51	adult	25183	-	spleen	23.6
Pleurodeles	waltl	adult	51	adult	25183	-	intestine	19.8
Pleurodeles	waltl	adult	51	adult	25183	-	liver	23.9
Pleurodeles	waltl	adult	51	adult	25183	-	heart	23.4
Pleurodeles	waltl	adult	51	adult	25183	-	lungs	20.1
Triturus	cristatus	young larva	38	two_fingers	26085	26078	whole	15.1
Triturus	cristatus	young larva	38	two_fingers	26086	26079	whole	19.1
Triturus	cristatus	young larva	41	four_fingers	26141	26078	head	15.9
Triturus	cristatus	young larva	41	four_fingers	26141	26078	middle	15
Triturus	cristatus	young larva	41	four_fingers	26141	26078	tail	15.3
Triturus	cristatus	young larva	42	two_toes	26143	26079	head	16.6
Triturus	cristatus	young larva	42	two_toes	26143	26079	middle	15.5
Triturus	cristatus	young larva	42	two_toes	26143	26079	tail	16.3
Triturus	cristatus	older larva	47	full_dev	26243	26078	middle_organs	15
Triturus	cristatus	older larva	47	full_dev	26243	26078	tail	15.8
Triturus	cristatus	older larva	47	full_dev	26245	26079	middle_organs	15.3
Triturus	cristatus	older larva	47	full_dev	26245	26079	tail	14.9
Triturus	cristatus	metamorphosis	49	mid_meta	26423	26079	middle_organs	15.5
Triturus	cristatus	metamorphosis	49	mid_meta	26423	26079	tail	13.4
Triturus	cristatus	metamorphosis	49	mid_meta	26424	26079	middle_organs	15.6
Triturus	cristatus	metamorphosis	49	mid_meta	26424	26079	tail	15.9
Triturus	cristatus	post metamorphosis	50	post_meta	26477	26078	middle	26.1
Triturus	cristatus	adult	51	adult	26078	-	lungs	13.9
Triturus	cristatus	adult	51	adult	26078	-	tail	13.2
Triturus	cristatus	adult	51	adult	26078	-	intestine	14
Triturus	cristatus	adult	51	adult	26078	-	liver	13.2
Triturus	cristatus	adult	51	adult	26078	-	heart	13.7
Triturus	cristatus	adult	51	adult	26079	-	lungs	17.9
Triturus	cristatus	adult	51	adult	26079	-	tail	17.6
Triturus	cristatus	adult	51	adult	26079	-	spleen	18
Triturus	cristatus	adult	51	adult	26079	-	intestine	20.1
Triturus	cristatus	adult	51	adult	26079	-	liver	15.8
Triturus	cristatus	adult	51	adult	26079	-	heart	17.4
Triturus	marmoratus	young larva	41	four_fingers	26513	26501	anterior	23
Triturus	marmoratus	young larva	41	four_fingers	26514	26502	anterior	23.5
Triturus	marmoratus	older larva	46	five_toes	26529	26501	middle	23.3
Triturus	marmoratus	older larva	46	five_toes	26531	26502	middle	24.3
Triturus	marmoratus	older larva	47	full_dev	26556	26501	middle	24.4
Triturus	marmoratus	older larva	47	full_dev	26619	26501	middle	24.4
Triturus	marmoratus	older larva	47	full_dev	26621	26502	middle	23.2
Triturus	marmoratus	metamorphosis	48	pre_meta	26625	26501	middle	23
Triturus	marmoratus	metamorphosis	49	mid_meta	26630	26501	middle	22.1
Triturus	marmoratus	post metamorphosis	50	post_meta	26632	26501	middle	21.2
Triturus	marmoratus	post metamorphosis	50	post_meta	26633	26501	middle	31.1
Triturus	marmoratus	adult	51	adult	26501	-	lungs	22
Triturus	marmoratus	adult	51	adult	26501	-	tail	19.3
Triturus	marmoratus	adult	51	adult	26501	-	spleen	28.7
Triturus	marmoratus	adult	51	adult	26501	-	intestine	20.9
Triturus	marmoratus	adult	51	adult	26501	-	liver	29.7
Triturus	marmoratus	adult	51	adult	26501	-	heart	20.1
Triturus	marmoratus	adult	51	adult	26502	-	lungs	20
Triturus	marmoratus	adult	51	adult	26502	-	tail	23.7
Triturus	marmoratus	adult	51	adult	26502	-	spleen	24.8
Triturus	marmoratus	adult	51	adult	26502	-	intestine	20.7
Triturus	marmoratus	adult	51	adult	26502	-	liver	26.3
Triturus	marmoratus	adult	51	adult	26502	-	heart	24.4

## Sheet: S5
Table S5. Amino acids at anchor residues.
Amino acids at nine residues important for anchoring the termini of antigenic peptides
that are conserved in classical MHC-I of most taxa (Kaufman et al. 1994; Sammut et al. 1999; Almeida et al. 2021).
Positions correspond to those of the protein alignment in supplementary data.
SeqIDs are the same as in the protein alignment and phylogenetic trees in Figs. S1, S3-S5
Species	SeqID	Category	N_cons_AA	28	81	106	143	163	166	167	180	192
Conserved AA			-	Y	Y	RY	FLY	T	KR	W	Y	Y
I. alpestris	Ia-01iso	MHC-I	9	Y	Y	R	F	T	R	W	Y	Y
I. alpestris	Ia-02iso	MHC-I	7	-	Y	R	F	T	R	W	Y	H
I. alpestris	Ia-03iso	MHC-I	9	Y	Y	R	F	T	R	W	Y	Y
I. alpestris	Ia-04iso	MHC-I	9	Y	Y	R	F	T	R	W	Y	Y
I. alpestris	Ia-05iso	MHC-I	9	Y	Y	R	F	T	R	W	Y	Y
I. alpestris	Ia-06iso	MHC-I	9	Y	Y	R	F	T	R	W	Y	Y
I. alpestris	Ia-07iso	MHC-I	7	Y	Y	R	F	S	R	L	Y	Y
I. alpestris	Ia-08iso	MHC-I	9	Y	Y	R	L	T	R	W	Y	Y
I. alpestris	Ia-09iso	MHC-I	9	Y	Y	R	F	T	R	W	Y	Y
I. alpestris	Ia-10iso	MHC-I	6	Y	H	R	F	S	R	W	F	Y
I. alpestris	Ia-11iso	MHC-I	8	Y	Y	R	F	T	Q	W	Y	Y
I. alpestris	Ia-12iso	MHC-I	8	Y	Y	R	F	T	Q	W	Y	Y
I. alpestris	Ia-13tri	MHC-I	8	Y	Y	R	F	T	R	W	Y	H
I. alpestris	Ia-14tri	MHC-I	9	Y	Y	R	F	T	R	W	Y	Y
I. alpestris	Ia-15tri	MHC-I	8	Y	Y	R	F	T	R	W	H	Y
I. alpestris	Ia-16tri	MHC-I	7	Y	Y	Q	F	T	S	W	Y	Y
I. alpestris	Ia-17tri	MHC-I	8	Y	Y	E	F	T	R	W	Y	Y
I. alpestris	Ia-18L1iso	MHC-I-like1	7	-	Y	R	L	I	R	W	Y	Y
I. alpestris	Ia-19L2iso	MHC-I-like2	3	Y	Y	Q	L	P	Q	G	-	H
I. alpestris	Ia-20L2iso	MHC-I-like2	4	Y	Y	Q	L	T	Q	G	-	H
I. alpestris	Ia-21L2tri	MHC-I-like2	2	-	F	Q	L	T	L	-	-	F
I. alpestris	Ia-22L2tri	MHC-I-like2	3	Y	Y	Q	Y	I	Q	G	-	L
I. alpestris	Ia-23L2tri	MHC-I-like2	3	Y	Y	Q	Y	I	Q	G	-	L
I. alpestris	Ia-24L2tri	MHC-I-like2	3	Y	Y	Q	Y	N	G	G	-	L
L. boscai	Lb-01iso	MHC-I	8	Y	Y	R	F	T	R	W	Y	H
L. boscai	Lb-02iso	MHC-I	8	A	Y	R	L	T	R	W	Y	Y
L. boscai	Lb-03iso	MHC-I	8	Y	Y	R	F	T	R	W	Y	H
L. boscai	Lb-04iso	MHC-I	9	Y	Y	R	F	T	R	W	Y	Y
L. boscai	Lb-05iso	MHC-I	9	Y	Y	R	F	T	R	W	Y	Y
L. boscai	Lb-06iso	MHC-I	9	Y	Y	R	F	T	R	W	Y	Y
L. boscai	Lb-07iso	MHC-I	9	Y	Y	R	F	T	R	W	Y	Y
L. boscai	Lb-08iso	MHC-I	9	Y	Y	R	F	T	R	W	Y	Y
L. boscai	Lb-09iso	MHC-I	8	Y	Y	R	F	T	R	W	Y	H
L. boscai	Lb-10iso	MHC-I	7	Y	Y	Q	F	T	S	W	Y	Y
L. boscai	Lb-11iso	MHC-I	8	Y	Y	R	F	T	Q	W	Y	Y
L. boscai	Lb-12tri	MHC-I	8	A	Y	R	F	T	R	W	Y	Y
L. boscai	Lb-13tri	MHC-I	9	Y	Y	R	F	T	R	W	Y	Y
L. boscai	Lb-14tri	MHC-I	9	Y	Y	R	F	T	R	W	Y	Y
L. boscai	Lb-15tri	MHC-I	7	Y	Y	E	F	T	H	W	Y	Y
L. boscai	Lb-16tri	MHC-I	7	A	Y	R	F	T	S	W	Y	Y
L. boscai	Lb-17tri	MHC-I	8	Y	Y	R	F	T	R	W	H	Y
L. boscai	Lb-19tri	MHC-I	9	Y	Y	R	F	T	R	W	Y	Y
L. boscai	Lb-20L1iso	MHC-I-like1	7	-	Y	R	L	I	R	W	Y	Y
L. boscai	Lb-21L2iso	MHC-I-like2	2	Y	F	Q	V	T	Q	-	-	F
L. boscai	Lb-22L2tri	MHC-I-like2	5	Y	Y	Q	L	T	R	G	-	L
L. boscai	Lb-23L2tri	MHC-I-like2	4	Y	F	Q	F	T	R	G	-	L
L. boscai	Lb-24L2tri	MHC-I-like2	3	Y	F	Q	F	T	Q	G	-	L
L. boscai	Lb-25L2tri	MHC-I-like2	4	Y	Y	E	Y	A	R	G	-	L
L. helveticus	Lh-11iso	MHC-I	8	Y	Y	R	F	T	R	W	F	Y
L. helveticus	Lh-12iso	MHC-I	8	Y	Y	R	F	T	R	W	Q	Y
L. helveticus	Lh-13iso	MHC-I	8	A	Y	R	F	T	R	W	Y	Y
L. helveticus	Lh-14iso	MHC-I	7	-	Y	R	F	T	R	W	F	Y
L. helveticus	Lh-15iso	MHC-I	9	Y	Y	R	F	T	R	W	Y	Y
L. helveticus	Lh-16iso	MHC-I	8	Y	Y	R	F	T	R	W	Y	H
L. helveticus	Lh-17iso	MHC-I	8	Y	Y	R	F	T	R	W	Y	H
L. helveticus	Lh-18iso	MHC-I	9	Y	Y	R	F	T	R	W	Y	Y
L. helveticus	Lh-19iso	MHC-I	7	Y	Y	P	F	A	R	W	Y	Y
L. helveticus	Lh-20iso	MHC-I	9	Y	Y	R	F	T	R	W	Y	Y
L. helveticus	Lh-21tri	MHC-I	8	Y	Y	R	F	T	R	W	F	Y
L. helveticus	Lh-22tri	MHC-I	7	-	Y	R	F	T	R	W	Y	H
L. helveticus	Lh-23tri	MHC-I	7	-	Y	R	F	T	R	W	F	Y
L. helveticus	Lh-24tri	MHC-I	7	Y	Y	Q	F	T	S	W	Y	Y
L. helveticus	Lihe-01	MHC-I	9	Y	Y	R	F	T	R	W	Y	Y
L. helveticus	Lihe-02	MHC-I	9	Y	Y	R	F	T	R	W	Y	Y
L. helveticus	Lihe-03	MHC-I	8	Y	Y	R	F	T	R	W	Y	H
L. helveticus	Lihe-04	MHC-I	9	Y	Y	R	F	T	R	W	Y	Y
L. helveticus	Lihe-05	MHC-I	9	Y	Y	R	F	T	R	W	Y	Y
L. helveticus	Lihe-06	MHC-I	7	Y	Y	R	F	T	Q	W	Y	H
L. helveticus	Lihe-07	MHC-I	8	Y	Y	R	F	T	R	W	F	Y
L. helveticus	Lihe-08	MHC-I	9	Y	Y	R	F	T	R	W	Y	Y
L. helveticus	Lihe-09	MHC-I	8	Y	Y	R	F	T	R	L	Y	Y
L. helveticus	Lihe-10	MHC-I	7	Y	Y	R	F	T	R	L	H	Y
L. helveticus	Lihe-L2-01	MHC-I-like2	3	Y	F	Q	L	T	Q	-	-	F
L. helveticus	Lihe-L2-02	MHC-I-like2	4	Y	F	Q	Y	T	R	G	-	L
L. vulgaris	Livu-01	MHC-I	9	Y	Y	R	F	T	R	W	Y	Y
L. vulgaris	Livu-02	MHC-I	8	Y	Y	E	F	T	R	W	Y	Y
L. vulgaris	Livu-03	MHC-I	8	A	Y	R	F	T	R	W	Y	Y
L. vulgaris	Livu-04	MHC-I	9	Y	Y	R	F	T	R	W	Y	Y
L. vulgaris	Livu-05	MHC-I	9	Y	Y	R	L	T	R	W	Y	Y
L. vulgaris	Livu-06	MHC-I	7	Y	Y	Q	F	T	S	W	Y	Y
L. vulgaris	Lv-07iso	MHC-I	8	L	Y	R	F	T	R	W	Y	Y
L. vulgaris	Lv-08iso	MHC-I	8	G	Y	R	F	T	R	W	Y	Y
L. vulgaris	Lv-09iso	MHC-I	7	A	Y	R	F	T	Q	W	Y	Y
L. vulgaris	Lv-10iso	MHC-I	8	Y	Y	R	F	T	R	W	Y	H
L. vulgaris	Lv-11iso	MHC-I	9	Y	Y	R	L	T	R	W	Y	Y
L. vulgaris	Lv-12iso	MHC-I	8	Y	Y	R	F	T	R	W	Y	H
L. vulgaris	Lv-13iso	MHC-I	9	Y	Y	R	F	T	R	W	Y	Y
L. vulgaris	Lv-14iso	MHC-I	9	Y	Y	R	F	T	R	W	Y	Y
L. vulgaris	Lv-15iso	MHC-I	9	Y	Y	R	F	T	R	W	Y	Y
L. vulgaris	Lv-16iso	MHC-I	9	Y	Y	R	F	T	R	W	Y	Y
L. vulgaris	Lv-17iso	MHC-I	9	Y	Y	R	F	T	R	W	Y	Y
L. vulgaris	Lv-18iso	MHC-I	9	Y	Y	R	F	T	R	W	Y	Y
L. vulgaris	Lv-19iso	MHC-I	9	Y	Y	R	F	T	R	W	Y	Y
L. vulgaris	Lv-20tri	MHC-I	9	Y	Y	R	F	T	R	W	Y	Y
L. vulgaris	Lv-21tri	MHC-I	9	Y	Y	R	F	T	R	W	Y	Y
L. vulgaris	Lv-22tri	MHC-I	8	A	Y	R	F	T	R	W	Y	Y
L. vulgaris	Lv-23tri	MHC-I	9	Y	Y	R	F	T	R	W	Y	Y
L. vulgaris	Lv-24tri	MHC-I	9	Y	Y	R	F	T	R	W	Y	Y
L. vulgaris	Lv-25tri	MHC-I	9	Y	Y	R	F	T	R	W	Y	Y
L. vulgaris	Livu-L1-01	MHC-I-like1	6	-	Y	R	L	I	R	W	Y	F
L. vulgaris	Lv-27L1tri	MHC-I-like1	7	-	Y	R	L	I	R	W	Y	Y
L. vulgaris	Livu-L2-01	MHC-I-like2	2	Y	F	Q	Y	I	P	G	-	L
L. vulgaris	Lv-29L2iso	MHC-I-like2	3	Y	Y	Q	Y	-	T	E	-	L
L. vulgaris	Lv-30L2iso	MHC-I-like2	3	Y	F	Q	L	T	Q	-	-	F
L. vulgaris	Lv-31L2tri	MHC-I-like2	2	Y	F	I	H	I	R	G	-	L
L. vulgaris	Lv-32L2tri	MHC-I-like2	6	Y	Y	Q	L	T	R	W	-	L
P. waltl	Plwa-01	MHC-I	9	Y	Y	R	F	T	R	W	Y	Y
P. waltl	Plwa-02	MHC-I	9	Y	Y	R	F	T	R	W	Y	Y
P. waltl	Plwa-03	MHC-I	8	Y	H	R	F	T	R	W	Y	Y
P. waltl	Plwa-05	MHC-I	9	Y	Y	R	F	T	R	W	Y	Y
P. waltl	Plwa-06	MHC-I	6	F	Y	Q	F	T	L	W	Y	Y
P. waltl	Plwa-07	MHC-I	9	Y	Y	R	F	T	R	W	Y	Y
P. waltl	Pw-07iso	MHC-I	9	Y	Y	R	F	T	R	W	Y	Y
P. waltl	Pw-08iso	MHC-I	9	Y	Y	R	F	T	R	W	Y	Y
P. waltl	Pw-09iso	MHC-I	9	Y	Y	R	F	T	R	W	Y	Y
P. waltl	Pw-10iso	MHC-I	9	Y	Y	R	F	T	R	W	Y	Y
P. waltl	Pw-11iso	MHC-I	9	Y	Y	R	F	T	R	W	Y	Y
P. waltl	Pw-12tri	MHC-I	9	Y	Y	R	F	T	R	W	Y	Y
P. waltl	Pw-13tri	MHC-I	9	Y	Y	R	F	T	R	W	Y	Y
P. waltl	Plwa-L1-01	MHC-I-like1	6	-	Y	K	L	I	R	W	Y	Y
P. waltl	Pw-15L1iso	MHC-I-like1	7	-	Y	R	L	I	R	W	Y	Y
P. waltl	Plwa-L2-01	MHC-I-like2	2	H	F	Q	F	N	T	W	-	L
T. cristatus	Tc-12iso	MHC-I	8	T	Y	R	F	T	R	W	Y	Y
T. cristatus	Tc-13iso	MHC-I	7	Y	Y	R	F	T	Q	W	D	Y
T. cristatus	Tc-14tri	MHC-I	8	Y	Y	R	F	T	Q	W	Y	Y
T. cristatus	Tc-15tri	MHC-I	8	Y	Y	R	F	T	R	W	F	Y
T. cristatus	Tc-16tri	MHC-I	8	Y	Y	R	F	T	R	W	Y	H
T. cristatus	Tc-17tri	MHC-I	9	Y	Y	R	F	T	R	W	Y	Y
T. cristatus	Tc-18tri	MHC-I	8	Y	Y	R	F	T	R	W	Y	H
T. cristatus	Tc-19tri	MHC-I	8	Y	Y	R	L	T	Q	W	Y	Y
T. cristatus	Trcr-01	MHC-I	9	Y	Y	R	F	T	R	W	Y	Y
T. cristatus	Trcr-02	MHC-I	9	Y	Y	R	F	T	R	W	Y	Y
T. cristatus	Trcr-03	MHC-I	8	Y	Y	R	F	T	Q	W	Y	Y
T. cristatus	Trcr-04	MHC-I	8	Y	Y	R	F	T	R	L	Y	Y
T. cristatus	Trcr-05	MHC-I	9	Y	Y	R	F	T	R	W	Y	Y
T. cristatus	Trcr-06	MHC-I	7	Y	H	R	F	T	R	W	F	Y
T. cristatus	Trcr-07	MHC-I	7	Y	Y	R	F	T	Q	W	D	Y
T. cristatus	Trcr-08	MHC-I	7	H	F	R	F	T	R	W	Y	Y
T. cristatus	Trcr-09	MHC-I	7	Y	Y	R	F	T	H	W	Y	H
T. cristatus	Trcr-10	MHC-I	8	Y	Y	R	F	T	R	W	Y	H
T. cristatus	Trcr-11	MHC-I	7	Y	Y	Q	F	T	S	W	Y	Y
T. cristatus	Trcr-L2-01	MHC-I-like2	3	Y	F	Q	L	V	R	-	-	L
T. cristatus	Trcr-L2-02	MHC-I-like2	5	Y	Y	Q	L	T	R	G	-	I
T. cristatus	Trcr-L2-03	MHC-I-like2	4	Y	F	Q	L	T	Q	-	-	Y
T. marmoratus	Tm-01iso	MHC-I	9	Y	Y	R	F	T	R	W	Y	Y
T. marmoratus	Tm-02iso	MHC-I	9	Y	Y	R	F	T	R	W	Y	Y
T. marmoratus	Tm-03iso	MHC-I	9	Y	Y	R	F	T	R	W	Y	Y
T. marmoratus	Tm-04iso	MHC-I	8	-	Y	R	F	T	R	W	Y	Y
T. marmoratus	Tm-05iso	MHC-I	9	Y	Y	R	F	T	R	W	Y	Y
T. marmoratus	Tm-06iso	MHC-I	9	Y	Y	R	F	T	R	W	Y	Y
T. marmoratus	Tm-07iso	MHC-I	7	H	F	R	F	T	R	W	Y	Y
T. marmoratus	Tm-08iso	MHC-I	8	Y	Y	E	F	T	R	W	Y	Y
T. marmoratus	Tm-09iso	MHC-I	7	Y	Y	Q	F	T	S	W	Y	Y
T. marmoratus	Tm-10iso	MHC-I	8	Y	Y	R	Y	T	R	W	Y	H
T. marmoratus	Tm-11iso	MHC-I	8	Y	Y	R	F	T	R	W	Y	H
T. marmoratus	Tm-12tri	MHC-I	7	Y	H	Q	F	T	R	W	Y	Y
T. marmoratus	Tm-13tri	MHC-I	9	Y	Y	R	F	T	R	W	Y	Y
T. marmoratus	Tm-14L1tri	MHC-I-like1	7	-	Y	R	L	I	R	W	Y	Y
T. marmoratus	Tm-15L2iso	MHC-I-like2	5	Y	Y	Q	Y	T	R	G	-	L
T. marmoratus	Tm-16L2tri	MHC-I-like2	2	Y	F	Q	Y	-	-	-	-	L
T. marmoratus	Tm-17L2tri	MHC-I-like2	2	Y	F	Q	L	S	L	R	-	L

## Sheet: S6
Table S6. The number of MHC-I genes and pseudogenes.
Sp – species, N - number of genes (gen) or transcript clusters (tran) from a particular category (MHC-I, MHC-I-like1, MHC-I-like2);
N pseudogenes refers to pseudogenes for all categories combined.
Transcript clusters were counted in the individual for which both PacBio Isoseq and RNA seq data were available,
with the exception of P. waltl, for which these were counted based solely on IsoSeq data.
NA – genome assembly not available; Total – total number of pseudogenes and gene fragments in the genome,
in MHC – the number of pseudogenes and gene fragments in the MHC region as defined in Fig. 3,
10 Mb of MHC – the number of pseudogenes and gene fragments in the MHC region as defined in Fig. 3 and including flanking 10 Mb.
Sp	N MHC-I		N MHC-I-like1		N MHC-I-like2		N MHC-I pseudogenes
	gen	tran	Gen	tran	gen	tran	total	in MHC	10Mb of MHC
I. alpestris	NA	15	NA	1	NA	3	NA	NA	NA
L. boscai	NA	15	NA	1	NA	1	NA	NA	NA
L. helveticus	10	15	0	0	2	1	23	19	23
L. vulgaris	6	17	1	1	1	4	16	12	15
P. waltl	8	10	1	2	1	0	8	8	8
T. cristatus	11	12	0	0	3	1	14	14	14
T. marmoratus	NA	12	NA	1	NA	2	NA	NA	NA

## Sheet: S7
Table S7. The number of MHC-II genes and pseudogenes in genomes.
g - full length DMA, DMB, MHC-IIA, MHC-IIB genes
ps - pseudogene
inMHC - the number of pseudogenes and gene fragments in the MHC region as defined in Fig. 3
within10Mb - the number of pseudogenes and gene fragments in the MHC region as defined in Fig. 3 and including flanking 10 Mb
Sp	gDMA	gDMB	gMHCIIA	MHC-IIAps_N	MHC-IIAps_N_inMHC	MHC-IIAps_N_within10Mb	gMHCIIB	MHC-IIBps_N	MHC-IIBps_N_inMHC	MHC-IIBps_N_within10Mb
L. helveticus	1	1	1	0	0	0	1	1	0	0
L. vulgaris	1	1	2	2	1	1	3	0	0	0
P. waltl	1	1	1	0	0	0	1	0	0	0
T. cristatus	1	1	1	21	0	0	1	3	0	0

## Sheet: S8
Table S8. Polymorphism of MHC-I genes in newt genomes.
Exon 2 alleles (variants) obtained by amplicon sequencing (Palomar et al. 2021; Gaczorek et al. 2023)
were aligned to genomes using blastn. All alleles with a bitscore within 90% of the best-matching allele
were considered to map to a given gene. N uniquely mapping - the number of alleles that mapped
exclusively to this gene at the 90% bitscore threshold. N multi-mapping - the number of alleles
that mapped to a gene, including those also mapping to other genes at the 90% threshold.
Polymorphism was calculated for each gene by weighting alleles that mapped to multiple genes as 1/n,
where n is the number of genes to which the allele mapped. Relative polymorphism expresses
the polymorphism of a gene as a fraction of that of the most polymorphic gene within the species
Species	Gene	N uniquely mapping	N multi-mapping	Polymorphism	Relative polymorphism
L. vulgaris	Livu-03	249	758	435.4	1
L. vulgaris	Livu-05	19	127	47.6	0.11
L. vulgaris	Livu-01	18	436	161.3	0.37
L. vulgaris	Livu-04	74	465	204.5	0.47
L. vulgaris	Livu-06	0	0	0	0
L. vulgaris	Livu-02	5	6	5.2	0.01
L. helveticus	Lihe-04	6	111	26	0.82
L. helveticus	Lihe-01	5	127	26.1	0.82
L. helveticus	Lihe-06	6	16	7.1	0.22
L. helveticus	Lihe-05	6	43	10.9	0.34
L. helveticus	Lihe-08	1	96	16	0.5
L. helveticus	Lihe-07	3	31	7.5	0.24
L. helveticus	Lihe-03	4	147	31.8	1
L. helveticus	Lihe-09	2	104	23.4	0.74
L. helveticus	Lihe-10	7	7	7	0.22
L. helveticus	Lihe-02	10	10	10	0.31
P. waltl	Plwa-04	0	4	2	0.11
P. waltl	Plwa-02	1	1	1	0.06
P. waltl	Plwa-06	0	0	0	0
P. waltl	Plwa-03	0	4	2	0.11
P. waltl	Plwa-05	1	4	2	0.11
P. waltl	Plwa-07	2	8	4.5	0.26
P. waltl	Plwa-01	15	21	17.5	1
P. waltl	Plwa-08	0	0	0	0
T. cristatus	Trcr-04	4	49	14.4	0.54
T. cristatus	Trcr-01	1	94	24.5	0.91
T. cristatus	Trcr-02	1	100	26.8	1
T. cristatus	Trcr-11	1	1	1	0.04
T. cristatus	Trcr-05	1	91	23.6	0.88
T. cristatus	Trcr-10	2	9	3.2	0.12
T. cristatus	Trcr-03	4	4	4	0.15
T. cristatus	Trcr-09	1	1	1	0.04
T. cristatus	Trcr-08	0	0	0	0
T. cristatus	Trcr-06	0	0	0	0
T. cristatus	Trcr-07	2	2	2	0.07

## Sheet: S9
Table S9. Additional primers amplifying exon 2 of MHC-I genes.
These primers were designed based on sequences of MHC-I genes annotated in L. vulgaris, P. waltl, and T. cristatusgenomes
and combined together with the primers used by Palomar et al. (2021) and Gaczorek et al. (2023)
to verify whether estimates of polymorphism from these studies were robust
Species	Direction	Primer name	Sequence (5'->3')
L. vulgaris	Forward	F4	CGCACTCCCTCAGGTACT
L. vulgaris	Reverse	R4	GTCTGGTTGAYTCGCTSCATC
L. vulgaris	Reverse	R5	GTCTGGTTGACTTCCTCCATC
P. waltl	Forward	F3	CGCATACTTGCCACTTTT
P. waltl	Reverse	R2	GTSTGGTTGGACTGGCCCAT
T. cristatus	Forward	F7	CACACTCCCTCAGGYAYT
T. cristatus	Forward	F8	CGCACTTCCTCAGGTATT
T. cristatus	Forward	F9	CACACTCCCTTCGGTATT
T. cristatus	Reverse	R6	GTCTGCTTGAGTTGGTTCATC
T. cristatus	Reverse	R7	GTCTGGTTGACTCGCTCCATG

## Sheet: S10
Table S10. The number of species-specific duplications and loses,
based on the Notung reconciliation of the species tree and the phylogeny of sequences MHC-I and MHC-I-like sequences shown in Fig. S1.
Species	N duplications	N losses
I. alpestris	6	6
L. boscai	6	7
L. helveticus	4	8
L. vulgaris	7	5
P. waltl	11	1
T. cristatus	8	6
T. marmoratus	4	7

[truncated: 1 more sheets: S11]
